1 ***In vivo* recombination of *Saccharomyces eubayanus* maltose-transporter genes yields a**  
2 **chimeric transporter that enables maltotriose fermentation**

3 Nick Brouwers<sup>1,#</sup>, Arthur R. Gorter de Vries<sup>1,#</sup>, Marcel van den Broek<sup>1</sup>, Susan M. Weening<sup>1</sup>, Tom D.  
4 Elink Schuurman<sup>2</sup>, Niels G. A. Kuijpers<sup>2</sup>, Jack T. Pronk<sup>1</sup> and Jean-Marc G. Daran<sup>1,\*</sup>

5 <sup>1</sup> Department of Biotechnology, Delft University of Technology, Van der Maasweg 9, 2629 HZ Delft,  
6 The Netherlands

7 <sup>2</sup> HEINEKEN Supply Chain B.V., Global Innovation and Research, Zoeterwoude, Netherlands

8 # These authors contributed equally to this publication and should be considered co-first authors

9 \* Corresponding author: Jean-Marc G. Daran, [j.g.daran@tudelft.nl](mailto:j.g.daran@tudelft.nl), Department of Biotechnology,  
10 Delft University of Technology, van der Maasweg 9, 2629 HZ Delft, The Netherlands

11

12

13

|                              |                                                                                      |                     |
|------------------------------|--------------------------------------------------------------------------------------|---------------------|
| 14 Nick Brouwers:            | <a href="mailto:N.Brouwers-1@tudelft.nl">N.Brouwers-1@tudelft.nl</a>                 |                     |
| 15 Arthur R. Gorter de Vries | <a href="mailto:A.R.GorterdeVries@tudelft.nl">A.R.GorterdeVries@tudelft.nl</a>       | 0000-0002-0841-6583 |
| 16 Marcel van den Broek:     | <a href="mailto:Marcel.vandenBroek@tudelft.nl">Marcel.vandenBroek@tudelft.nl</a>     |                     |
| 17 Susan M. Weening          | <a href="mailto:S.M.Weening@tudelft.nl">S.M.Weening@tudelft.nl</a>                   |                     |
| 18 Tom D. Elink Schuurman    | <a href="mailto:Tom.elinkschuurman@heineken.com">Tom.elinkschuurman@heineken.com</a> |                     |
| 19 Niels G. A. Kuijpers      | <a href="mailto:Niels.kuijpers@heineken.com">Niels.kuijpers@heineken.com</a>         |                     |
| 20 Jack T. Pronk:            | <a href="mailto:J.T.Pronk@tudelft.nl">J.T.Pronk@tudelft.nl</a>                       | 0000-0002-5617-4611 |
| 21 Jean-Marc G Daran:        | <a href="mailto:J.G.Daran@tudelft.nl">J.G.Daran@tudelft.nl</a>                       | 0000-0003-3136-8193 |

22

23

24

25 Keywords: laboratory evolution, neofunctionalization, sugar transport, domestication, chromosomal  
26 recombination.

27 Manuscript for submission in PLoS Genetics

## 28 **Abstract**

29 *Saccharomyces pastorianus* lager-brewing yeasts are aneuploid *S. cerevisiae* x *S. eubayanus* hybrids,  
30 whose genomes have been shaped by domestication in brewing-related contexts. In contrast to most  
31 *S. cerevisiae* and *S. pastorianus* strains, *S. eubayanus* cannot utilize maltotriose, a major  
32 carbohydrate in brewer's wort. Accordingly, *S. eubayanus* CBS 12357<sup>T</sup> harbors four *SeMALT* maltose-  
33 transporter genes, but no genes resembling the *S. cerevisiae* maltotriose-transporter gene *ScAGT1* or  
34 the *S. pastorianus* maltotriose-transporter gene *SpMTY1*. To study the evolvability of maltotriose  
35 utilization in *S. eubayanus* CBS 12357<sup>T</sup>, maltotriose-assimilating mutants obtained after UV  
36 mutagenesis were subjected to laboratory evolution in carbon-limited chemostat cultures on  
37 maltotriose-enriched wort. An evolved strain showed improved maltose and maltotriose  
38 fermentation, as well as an improved flavor profile, in 7-L fermenter experiments on industrial wort.  
39 Whole-genome sequencing revealed a novel mosaic *SeMALT413* gene, resulting from repeated gene  
40 introgressions by non-reciprocal translocation of at least three *SeMALT* genes. The predicted tertiary  
41 structure of *SeMalt413* was comparable to the original *SeMalt* transporters, but overexpression of  
42 *SeMALT413* sufficed to enable growth on maltotriose, indicating gene neofunctionalization had  
43 occurred. The mosaic structure of *SeMALT413* resembles the structure of *S. pastorianus* maltotriose-  
44 transporter gene *SpMTY1*, which has sequences with high similarity to alternately *ScMALx1* and  
45 *SeMALT3*. Evolution of the maltotriose-transporter landscape in hybrid *S. pastorianus* lager-brewing  
46 strains is therefore likely to have involved mechanisms similar to those observed in the present  
47 study.

## 48 **Author Summary**

49 Fermentation of the wort sugar maltotriose is critical for the flavor profile obtained during beer  
50 brewing. The recently discovered yeast *Saccharomyces eubayanus* is gaining popularity as an  
51 alternative to *S. pastorianus* and *S. cerevisiae* for brewing, however it is unable to utilize maltotriose.  
52 Here, a combination of non-GMO mutagenesis and laboratory evolution of the *S. eubayanus* type  
53 strain CBS 12357<sup>T</sup> was used to enable maltotriose fermentation in brewer's wort. A resulting *S.*  
54 *eubayanus* strain showed a significantly improved brewing performance, including improved maltose  
55 and maltotriose consumption and a superior flavor profile. Whole genome sequencing identified a  
56 novel transporter gene, *SeMALT413*, which was formed by recombination between three different  
57 *SeMALT* maltose-transporter genes. Overexpression of *SeMALT413* in CBS 12357<sup>T</sup> confirmed its  
58 neofunctionalization as a maltotriose transporter. The mosaic structure of the maltotriose  
59 transporter *SpMty1* in *S. pastorianus* resembles that of *SeMalt413*, suggesting that maltotriose  
60 utilization likely emerged through similar recombination events during the domestication of current  
61 lager brewing strains.

## 62 Introduction

63 *Saccharomyces eubayanus* was discovered in Patagonia and identified as the non-*S. cerevisiae*  
64 parental species of hybrid *S. pastorianus* lager-type beer brewing yeasts (1, 2). While *S. eubayanus*  
65 has only been isolated from the wild (3-5), *S. cerevisiae* is strongly associated with biotechnological  
66 processes, including dough leavening, beer brewing and wine fermentation (6). The raw material for  
67 beer brewing is wort, a complex medium containing a fermentable sugar mixture of 60% maltose,  
68 25% maltotriose and 15% glucose (7). While most *S. cerevisiae* strains utilize all three sugars, *S.*  
69 *eubayanus* strains cannot utilize maltotriose (8-10). In *Saccharomyces*, the ability to utilize maltose  
70 and maltotriose is associated with *MAL* loci which are present on up to five different chromosomes  
71 (11). *MAL* loci typically harbor genes from up to three gene families: a *MALT* maltose proton-  
72 symporter gene, a *MALS*  $\alpha$ -glucosidase gene which hydrolyses sugars into glucose, and a *MALR*  
73 regulator gene that induces the transcription of *MALT* and *MALS* genes in the presence of maltose  
74 (12). In *S. cerevisiae*, most *MAL* loci harbor an *ScMalx1* transporter, which transports maltose and  
75 other disaccharides, such as turanose and sucrose (13, 14), but cannot import the trisaccharide  
76 maltotriose (15). However, the *MAL1* locus located on chromosome VII of *S. cerevisiae* contains  
77 *ScAGT1*, a transporter gene with only 57% nucleotide identity with *ScMALx1* transporter genes.  
78 *ScAGT1* encodes a broad-substrate-specificity sugar-proton symporter that enables maltotriose  
79 uptake (15-17). In *S. eubayanus* four *MAL* loci harbor a *MALT* gene with high homology to *ScMALx1*  
80 genes: *SeMALT1*, *SeMALT2*, *SeMALT3* and *SeMALT4* (18). Deletion of these genes in *S. eubayanus* type  
81 strain CBS 12357<sup>T</sup> indicated that its growth on maltose relies on expression of *SeMALT2* and  
82 *SeMALT4* (9). *SeMALT1* and *SeMALT3* were found to be poorly expressed in the presence of maltose  
83 in this strain, supposedly due to incompleteness of the *MAL* loci which harbor them. However, no  
84 homolog of *ScAGT1* was found in the genome of CBS 12357<sup>T</sup>, and neither CBS 12357<sup>T</sup> nor its  
85 derivatives overexpressing *SeMALT* genes were able to utilize maltotriose (9).

86 Laboratory-made *S. cerevisiae* x *eubayanus* hybrids combined the fermentative capacity and  
87 sugar utilization of *S. cerevisiae* with the ability of *S. eubayanus* to grow at low temperatures (8, 19,

88 20). Most likely, maltotriose utilization in these laboratory hybrids was enabled by the *ScAGT1* gene  
89 in the *S. cerevisiae* parental genome. Paradoxically, *S. pastorianus* strains that utilize maltotriose  
90 contain a non-functional, truncated *ScAGT1* allele (21). In such strains, maltotriose utilization has  
91 been attributed to two *S. pastorianus*-specific genes. *SpMTY1* shares 90% sequence identity with  
92 *ScMALx1* genes and enabled both maltose and maltotriose transport, with a higher affinity for the  
93 latter (22, 23). *SpMTY1* also shows sequence similarity with *SeMALT* genes (24, 25). The second gene,  
94 named *SeAGT1* because it was found in the *S. eubayanus* subgenome of *S. pastorianus* strains, shares  
95 85% sequence identity with *ScAGT1* (26). In accordance with their sequence similarity, *SeAgt1* and  
96 *ScAgt1* both enable high-affinity maltotriose import (27). Despite their presence in the *S. pastorianus*  
97 genome, the maltotriose transporter genes *SpMTY1* and *SeAGT1* were not found in the genome of *S.*  
98 *eubayanus* CBS 12357<sup>T</sup> (9, 18).

99 The *MALT* transporter genes in *S. eubayanus*, *S. cerevisiae* and *S. pastorianus* are localized to  
100 the subtelomeric regions (9, 14, 15, 18, 22, 23), which are gene-poor and repeat-rich sequences  
101 adjacent to the telomeres (28-30). These regions are known hotspots of genetic variation in  
102 *Saccharomyces* genomes (30-32). The presence of repeated sequences makes subtelomeric regions  
103 genetically unstable by promoting recombinations (33, 34). As a result, subtelomeric gene families  
104 are particularly diverse across different strains (32, 35, 36). In *S. cerevisiae*, subtelomeric gene  
105 families contain more genes than non-subtelomeric gene families, reflecting a higher incidence of  
106 gene duplications (35). As previously shown in *Candida albicans* submitted to long term laboratory  
107 evolution, the gene repertoire of the subtelomeric *TLO* family can be extensively altered due to  
108 ectopic recombinations between subtelomeric regions of different chromosomes, resulting in copy  
109 number expansion, in gene disappearance and in formation of new chimeric genes (37). Despite their  
110 common origin, genes within one family can have different functions, due to the accumulation of  
111 mutations (38, 39). *In silico* analysis of the sequences and functions of genes from the *MALT*, *MALS*  
112 and *MALR* gene families indicated functional diversification through gene duplication and mutation  
113 (35). Indeed, the presence of multiple gene copies can facilitate the emergence of advantageous

114 mutations mainly by one of three mechanisms: (i) neofunctionalization, corresponding to the  
115 emergence of a novel function which was previously absent in the gene family (40), (ii)  
116 subfunctionalization, corresponding to the specialization of gene copies for part of the function of  
117 the parental gene (41) and (iii) altered expression due to gene dosage effects resulting from the  
118 increased copy number (42). While the different functions of *MALS* genes were assigned to  
119 subfunctionalization of the ancestral *MALS* gene (43), the maltotriose transporter gene *ScAGT1* was  
120 proposed to result from neofunctionalization within the *MALT* family (35). In general, the emergence  
121 of a large array of gene functions was attributed to subfunctionalization and neofunctionalization  
122 (35, 37, 43-47). However, current evidence for neofunctionalization within subtelomeric gene  
123 families is based on *a posteriori* analysis and rationalization of existing diversity. While in some cases  
124 the genetic process leading to neofunctionalization could be reconstructed at the molecular level  
125 (47-49), the emergence of a completely new function within a subtelomeric gene family was never  
126 observed within the timespan of an experiment to the best of our knowledge. However, the genetic  
127 diversity within *Saccharomyces MALT* transporters suggests that evolution of *SeMalt* transporters  
128 could lead to the emergence of a maltotriose transporter by neofunctionalization (35). Therefore,  
129 laboratory evolution may be sufficient to obtain maltotriose utilization in *S. eubayanus* strain CBS  
130 12357<sup>T</sup>.

131 Laboratory evolution is a commonly-used non-GMO method for obtaining desired properties  
132 by prolonged growth and selection under conditions favoring cells which develop the desired  
133 phenotype (50, 51). Similarly as in Darwinian natural evolution, the conditions under which  
134 laboratory evolution is conducted shape the phenotypes acquired by evolved progeny by the process  
135 of survival of the fittest (52). In *Saccharomyces* yeasts, selectable properties include complex and  
136 diverse phenotypes such as high temperature tolerance, efficient nutrient utilization and inhibitor  
137 tolerance (53-56). Laboratory evolution was successfully applied to improve sugar utilization for  
138 arabinose, galactose, glucose and xylose (54, 57-59). In *S. pastorianus*, improved maltotriose uptake  
139 was successfully selected for in a prolonged chemostat cultivation on medium enriched with

140 maltotriose (60). Theoretically, laboratory evolution under similar conditions could select *S.*  
141 *eubayanus* mutants which develop the ability to utilize maltotriose.

142 In this study, we submitted *S. eubayanus* strain CBS 12357<sup>T</sup> to UV-mutagenesis and  
143 laboratory evolution in order to obtain maltotriose utilization under beer brewing conditions. While  
144 obtaining a non-GMO maltotriose-consuming *S. eubayanus* strain was a goal in itself for industrial  
145 beer brewing, we were particularly interested in the possible genetic mechanisms leading to the  
146 emergence of maltotriose utilization. Indeed, we hypothesized that the genetic plasticity of the four  
147 subtelomeric *SeMALT* genes of CBS 12357<sup>T</sup> could facilitate the emergence of maltotriose transport by  
148 neofunctionalization. In *S. cerevisiae* the emergence of maltotriose transporter *ScAgt1* is attributed  
149 to neofunctionalization within the *MALT* gene family, and in *S. pastorianus*, the origin of the  
150 maltotriose transporter genes *SpMTY1* and *SeAGT1* remains to be elucidated. Therefore, the  
151 evolution process leading to maltotriose utilization in a strain with only maltose transporters, such as  
152 CBS 12357<sup>T</sup>, may provide insight in the emergence of maltotriose utilization in general.

## 153 **Results**

### 154 **Mutagenesis and evolution enables *S. eubayanus* to utilize maltotriose**

155 The *S. eubayanus* strain CBS 12357<sup>T</sup> consumes maltose but not maltotriose, one of the main  
156 fermentable sugars in brewer's wort (8). To select for maltotriose-consuming mutants, CBS 12357<sup>T</sup>  
157 was sporulated, submitted to mild UV-mutagenesis (46% survival rate) and the mutagenized  
158 population was inoculated at 20 °C in synthetic medium containing 20 g L<sup>-1</sup> maltotriose (SMMt) as  
159 sole carbon source. After two weeks, growth was observed and, after 3 weeks, the maltotriose  
160 concentration had decreased to 10.5 g L<sup>-1</sup>. After two subsequent transfers in fresh SMMt, 96 single  
161 cells were sorted into a microtiter YPD plate by fluorescence-activated cell sorting (FACS). The  
162 resulting single-cell cultures were transferred to a next microtiter SMMt plate, in which growth was  
163 monitored by OD<sub>660</sub> measurements. The seven single-cell isolates with the highest final OD<sub>660</sub> were  
164 selected and named IMS0637-IMS0643. To characterize growth on maltotriose, the strain CBS  
165 12357<sup>T</sup>, the single-cell isolates IMS0637-IMS0643 and the maltotriose-consuming *S. pastorianus*  
166 strain CBS 1483 were grown in shake flasks on SMMt (Figure 1A and Supplementary Figure S1). After  
167 187 h, *S. eubayanus* CBS 12357<sup>T</sup> did not show any maltotriose consumption. Conversely, isolates  
168 IMS0637-IMS0643, all showed over 50% maltotriose consumption after 91 h (as compared to 43 h for  
169 CBS 1483). Upon reaching stationary phase, isolates IMS0637-IMS0643 had consumed 93 ± 2% of the  
170 initial maltotriose concentration, which was similar to the 92 % conversion reached by *S. pastorianus*  
171 CBS 1483. While these results indicated that the single cell isolates IMS0637-IMS0643 utilized  
172 maltotriose in synthetic medium, they did not consume maltotriose after 145 h of incubation in  
173 shake-flasks containing 3-fold diluted wort (Figure 1B). Under the same conditions, *S. pastorianus*  
174 CBS 1483 consumed 50% of the wort maltotriose after 145 h (Figure 1B).

175       Nutrient-limited growth confers a selective advantage to spontaneous mutants with a higher  
176 nutrient affinity (50, 60). Therefore, to improve maltotriose utilization under industrially relevant  
177 conditions, the pooled isolates IMS0637-IMS0643 were subjected to laboratory evolution in a  
178 chemostat culture on modified brewer's wort. To ensure a strong selective advantage for



179 maltotriose-consuming cells while maintaining carbon-limitation, the brewer's wort was diluted 6-  
180 fold and complemented with 10 g L<sup>-1</sup> maltotriose, yielding concentrations of 2 g L<sup>-1</sup> glucose, 15 g L<sup>-1</sup>  
181 maltose and 15 g L<sup>-1</sup> maltotriose in the medium feed. To prevent growth limitation due to the  
182 availability of limited oxygen or nitrogen, the medium was supplemented with 10 mg L<sup>-1</sup> ergosterol,  
183 420 mg L<sup>-1</sup> Tween 80 and 5 g L<sup>-1</sup> ammonium sulfate (61). During the batch cultivation phase that  
184 preceded continuous chemostat cultivation, glucose and maltose were completely consumed,  
185 leaving maltotriose as the only carbon source. After initiation of continuous cultivation at a dilution  
186 rate of 0.03 h<sup>-1</sup>, the medium outflow initially contained 13.2 g L<sup>-1</sup> of maltotriose. After 121 days of  
187 chemostat cultivation, the maltotriose concentration had progressively decreased to 7.0 g L<sup>-1</sup> (Figure  
188 1C). At that point, 10 single colony isolates were made from the culture on SMMt agar plates and  
189 incubated at 20 °C. Three single-cell lines were named IMS0750, IMS0751 and IMS0752 and selected  
190 for further characterization in micro-aerobic cultures, grown at 12 °C on 3-fold diluted wort, along  
191 with *S. eubayanus* CBS 12357<sup>T</sup> and *S. pastorianus* CBS 1483 (Figure 1D). In these cultures, strains CBS  
192 12357<sup>T</sup> and IMS0751 only consumed glucose and maltose, while *S. pastorianus* CBS 1483, as well as  
193 the evolved isolates IMS0750 and IMS0752, also consumed maltotriose. After 263 h, maltotriose  
194 concentrations in cultures of strains IMS0750 and IMS0752 had decreased from 20 to 4.3 g L<sup>-1</sup>  
195 maltotriose as compared to 2.0 g L<sup>-1</sup> in cultures of strain CBS 1483. Due to its inability to utilize  
196 maltotriose in wort, IMS0751 was not studied further.

### 197 **Whole genome sequencing reveals a new recombined chimeric *SeMALT* gene**

198 We sequenced the genomes of the *S. eubayanus* strain CBS 12357<sup>T</sup>, of the UV-mutagenized isolates  
199 IMS0637-IMS0643 and of the strains isolated after subsequent chemostat evolution IMS0750 and  
200 IMS0752 using paired-end Illumina sequencing. Sequencing data were mapped to a chromosome-  
201 level assembly of strain CBS 12357<sup>T</sup> (9) to identify SNPs, INDELs and copy number changes. The  
202 genomes of the UV-mutants IMS0637, IMS0640, IMS0641 and IMS0642 shared a set of 116 SNPs, 5  
203 INDELs and 1 copy number variation (Figure 2A, Supplementary data file 1). In addition to these  
204 shared mutations, isolates IMS0638, IMS0639 and IMS0643 carried three identical SNPs. Of the

205 mutations in IMS0637, 34 SNPs and all 5 INDELS affected intergenic regions, 30 SNPs were  
206 synonymous, 48 SNPs resulted in amino acid substitutions and 4 SNPs resulted in premature stop  
207 codon (Supplementary data file 1). None of the 52 non-synonymous SNPs affected genes previously  
208 linked to maltotriose utilization. The only copy number variation concerned a duplication of the right  
209 subtelomeric region of CHRVIII. Read mate pairing indicated that the duplicated region was attached  
210 to the left arm of CHRII, causing the replacement of left subtelomeric region of CHRII by a non-  
211 reciprocal translocation. The affected region of CHRII harbored the *SeMALT1* gene, which is not  
212 expressed in CBS 12357<sup>T</sup> (9).

213           Since the ability to utilize maltotriose in wort emerged only after laboratory evolution during  
214 chemostat cultivation, mutations present in the chemostat-evolved strains IMS0750 and IMS0752  
215 were studied in more detail. With the exception of one silent SNP, IMS0750 and IMS0752 were  
216 identical and shared 100 SNPs, 3 INDELS and 5 copy number changes (Supplementary data file 1). Of  
217 these mutations, only 5 SNPs and 4 copy number changes were absent in IMS0637-IMS0643, and  
218 could therefore explain the ability to utilize maltotriose in wort (Figure 2A). The 5 SNPs consisted of  
219 two intergenic SNPs and three non-synonymous SNPs in genes with no link to maltotriose. However,  
220 the changes in copy number affected several regions harboring *SeMALT* genes: a duplication of 550  
221 bp of CHRII including *SeMALT1* (coordinates 8,950 to 9,500), a duplication of the left arm of CHRXIII  
222 including *SeMALT3* (coordinates 1-10,275), loss of the left arm of CHRXVI (coordinates 1-15,350), and  
223 loss of 5.5 kb of CHRXVI including *SeMALT4* (coordinates 16,850-22,300). Analysis of read mate  
224 pairing indicated that the copy number variation resulted from a complex set of recombinations  
225 between chromosomes II, XIII and XVI.

226           The high degree of similarity of the affected *MAL* loci and their localization in the  
227 subtelomeric regions made exact reconstruction of the mutations difficult. Therefore, IMS0637 and  
228 IMS0750 were sequenced using long-read sequencing on ONT's MinION platform, and a *de novo*  
229 genome assembly was made for each strain. Comparison of the resulting assemblies to the  
230 chromosome-level assembly of CBS 12357<sup>T</sup> indicated that two recombinations had occurred. Both in

231 IMS0637 and IMS0750, an additional copy of the terminal 11.5 kbp of the right arm of chromosome  
232 VIII had replaced the terminal 11.4 kbp of one of the two copies of the left arm of chromosome II  
233 (Figure 2B). This recombination was consistent with the copy number changes of the affected regions  
234 in IMS0637-IMS0643, IMS0750 and IMS0752 and resulted in the loss of one copy of the *MAL* locus  
235 harboring *SeMALT1*. In addition, the genome assembly of IMS0750 indicated the replacement of  
236 both copies of the first 22.3 kbp of CHRXVI by complexly rearranged sequences from CHRII, CHRXVIII  
237 and CHRXVI. The recombined region comprised the terminal 10,273 nucleotides of the left arm of  
238 CHRIII, followed by 693 nucleotides from CHRII, 1,468 nucleotides from CHRXVI and 237 nucleotides  
239 from CHRXIII (Figure 2B). The recombinations were non reciprocal, as the regions present on the  
240 recombined chromosome showed increased sequencing coverage while surrounding regions were  
241 unaltered. This recombination resulted in the loss of the canonical *MAL* locus harboring *SeMALT4* on  
242 chromosome XVI. However, the recombined sequence contained a chimeric open reading frame  
243 consisting of the 5' part of *SeMALT4* from CHRXVI, the middle of *SeMALT1* from CHRII and the 3' part  
244 of *SeMALT3* from CHRXIII (Figure 2C, Supplementary Figure S2). To verify this recombination, the ORF  
245 was PCR amplified using primers binding on the promotor of *SeMALT4* and the terminator of  
246 *SeMALT3*, yielding a fragment for strain IMS0750, but not for CBS 12357<sup>T</sup>. Sanger sequencing of the  
247 fragment amplified from strain IMS0750 confirmed the chimeric organization of the ORF, which we  
248 named *SeMALT413*. The sequence of *SeMALT413* showed 100% identity to *SeMALT4* for nucleotides  
249 1-434 and 1113-1145, 100% similarity to *SeMALT1* for nucleotides 430-1122 and 100% similarity to  
250 *SeMALT3* for nucleotides 1141-1842 (Figure 2C). Nucleotides 1123-1140, which showed only 72%  
251 identity with *SeMALT1* and 61% identity with *SeMALT3*, were found to represent an additional  
252 introgression (Figure 2B). While the first 434 nucleotides can be unequivocally attributed to *SeMALT4*  
253 due to a nucleotide difference with *SeMALT2*, the nucleotides 1123-1140 are identical in *SeMALT2*  
254 and *SeMALT4*. Therefore, this part of the sequence of *SeMALT413* might have come from *SeMALT2*  
255 on CHRVI or from *SeMALT4* on CHRXVI. Overall, *SeMALT413* showed a sequence identity of only 85 to  
256 87% with the original *SeMALT* genes, with the corresponding protein sequence exhibiting between

257 52 and 88% identity. We therefore hypothesized that the recombined *SeMalt413* transporter might  
258 have an altered substrate specificity and thereby enable maltotriose utilization.

259 The tertiary structure of the chimeric *SeMALT413* gene was predicted with SWISS-MODEL  
260 (<https://swissmodel.expasy.org/>), based on structural homology with the *Escherichia coli* xylose-  
261 proton symporter XylE (62), which has previously been used as a reference to model the structure of  
262 *ScAgt1* (63). Similarly to the maltose transporters in *Saccharomyces*, XylE is a proton symporter  
263 belonging to the major facilitator superfamily with a transmembrane domain composed of 12  $\alpha$ -  
264 helices (Supplementary Figure S3). The same structure was predicted for *SeMalt413*, with 1  $\alpha$ -helix  
265 formed exclusively by residues from *SeMalt4*, 4  $\alpha$ -helices formed by residues from *SeMalt1* and 5  $\alpha$ -  
266 helices formed exclusively by residues from *SeMalt3* (Figure 2D). The remaining two  $\alpha$ -helices were  
267 composed of residues from more than one transporter. Since the first 100 amino acids were  
268 excluded from the model due to absence of similar residues in the xylose symporter reference  
269 model, the structure prediction underestimated the contribution of *SeMalt4*. The three-dimensional  
270 arrangement of the  $\alpha$ -helices of *SeMalt413* was almost identical to *SeMalt1*, *SeMalt3* and *SeMalt4*,  
271 indicating that it retained the general structure of a functional maltose transporter (Supplementary  
272 Figure S4).

### 273 **Introduction of the *SeMALT413* gene in wildtype CBS 12357<sup>T</sup> enables maltotriose utilization**

274 The small structural differences identified between *SeMalt413* and the wild-type *S. eubayanus* Malt  
275 transporters could not be used to predict the ability of *SeMalt413* to transport maltotriose (63).  
276 Therefore, to investigate its role in maltotriose transport, *SeMALT413* and, as a control, *SeMALT2*  
277 were overexpressed in the wild-type strain *S. eubayanus* CBS 12357<sup>T</sup> (Figure 3A and Supplementary  
278 Figure S5). Growth of the resulting strains *S. eubayanus* IMX1941 (*SeSGA1 $\Delta$ ::ScTEF1<sub>pr</sub>-SeMALT2-*  
279 *ScCYC1<sub>ter</sub>*) and IMX1942 (*SeSGA1 $\Delta$ ::ScTEF1<sub>pr</sub>-SeMALT413-ScCYC1<sub>ter</sub>*), as well as the wild-type strain  
280 CBS 12357<sup>T</sup> and the evolved isolate IMS0750 was tested on SM supplemented with different carbon  
281 sources (Supplementary Figure S6). On glucose, strains IMX1941 and IMX1942 exhibited the same  
282 specific growth rate of  $0.25 \pm 0.01 \text{ h}^{-1}$  as CBS 12357<sup>T</sup>, while IMS0750 grew faster with a growth rate of

283  $0.28 \pm 0.01 \text{ h}^{-1}$ . Glucose was completely consumed after 33 h (Figure 3B). On maltose, the specific  
284 growth rates of CBS 12357<sup>T</sup>, IMX1941, IMX1942 and IMS0750 ranged between  $0.17$  and  $0.19 \text{ h}^{-1}$  and  
285 did not differ significantly. Maltose was completely consumed after 43 h (Figure 3C). On maltotriose,  
286 only the evolved mutant IMS0750 and reverse engineered strain IMX1942 (*ScTEF1<sub>pr</sub>-SeMALT413-*  
287 *ScCYC1<sub>ter</sub>*) showed growth. IMS0750 grew with a specific growth rate of  $0.19 \pm 0.01 \text{ h}^{-1}$  and consumed  
288 55% of maltotriose within 172 h. Over the same period, IMX1942 grew at  $0.03 \pm 0.00 \text{ h}^{-1}$  and  
289 consumed 45% of the maltotriose after 172 h (Figure 3D), demonstrating the capacity of *SeMALT413*  
290 to transport maltotriose.

### 291 **The *SpMTY1* maltotriose transporter gene displays a similar chimeric structure as *SeMALT413***

292 The mosaic structure of the maltotriose transporter gene *SeMALT413* led us to reinvestigate  
293 the sequence of maltotriose transporters in *Saccharomyces* genomes. The sequence similarity of  
294 *ScAGT1* and *SeAGT1* to maltose transporters from the *MALT* family such as *ScMAL31* is roughly  
295 homogenous over their coding region. In contrast, the identity of some segments of *SpMTY1* relative  
296 to *ScMAL31* deviates strongly from the average identity of 89% (22). Indeed, sequence identity with  
297 *ScMAL31* of *S. cerevisiae* S288C (64) is above 98% for nucleotides 1-439, 627-776, 796-845, 860-968  
298 and 1,640-1,844, while it is only 79% for nucleotides 440-626, 65% for nucleotides 777-795, 50% for  
299 nucleotides 846-859 and 82% for nucleotides 969-1,639 (Supplementary Figure S7). Alignment of the  
300 sequences of *S. eubayanus* CBS 12357<sup>T</sup> *SeMALT* genes (9) to *SpMTY1* showed high sequence identity  
301 with *SeMALT3* across several regions that showed significant divergence from the corresponding  
302 *ScMAL31* sequences: 91% similarity for nucleotides 478-533, 94% similarity for nucleotides 577-626  
303 and 94% similarity for nucleotides 778-794 (Supplementary Figure S7). These observations would  
304 indicate that the evolution of *SpMTY1* might have involved introgression events similar to those  
305 responsible for the *SeMALT413* neofunctionalization described in the present study. However,  
306 introgressions from *SeMALT* genes cannot explain the entire *SpMTY1* gene structure. Its evolution  
307 may therefore have involved multiple introgressions, similarly as for *SeMALT413*. While most regions  
308 with low similarity to *ScMAL31* and *SeMALT3* were too short to identify their provenance, the

309 sequence corresponding to the 969<sup>th</sup> to 1,639<sup>th</sup> nucleotide of *SpMTY1* could be blasted on NCBI. In  
310 the S288C genome, *ScMAL31* was the closest hit with 82% identity. However, when blasting the  
311 sequence against the full repository excluding *S. pastorianus* genomes, the closest hit was the  
312 orthologue of *ScMAL31* on chromosome VII of *S. paradoxus* strain YPS138. In addition to an 89%  
313 similarity to nucleotides 969-1,639 of *SpMTY1*, *SparMAL31* had a similarity of 94% for nucleotides  
314 544-575 and of 93% for nucleotides 846-859 (Supplementary Figure S7). Therefore, *SparMAL31* may  
315 have contributed sequence to the 3' part of *SpMTY1* by horizontal gene transfer.

### 316 **Applicability of a maltotriose-consuming *S. eubayanus* strain for lager beer brewing**

317 *S. eubayanus* strains are currently used for industrial lager beer brewing (9). To test the evolved  
318 strain IMS0750 under laboratory-scale brewing conditions, its performance was compared with that  
319 of its parental strain CBS 12357<sup>T</sup> in 7-L cultures grown on high-gravity (16.6 ° Plato) wort (Figure 4).  
320 After 333 h, IMS0750 had completely consumed all glucose and maltose, and the concentration of  
321 maltotriose had dropped from 19.3 to 4.7 g L<sup>-1</sup> (Figure 4). In contrast, CBS 12357<sup>T</sup> did not utilize any  
322 maltotriose. In addition to its improved maltotriose utilization, IMS0750 also showed improved  
323 maltose consumption: maltose was completely consumed within 200 h, while complete maltose  
324 consumption by strain CBS 12357<sup>T</sup> took 333 h (Figure 4). Consistent with its improved sugar  
325 utilization, the final ethanol concentration in cultures of strain IMS0750 was 18.5% higher than in  
326 corresponding cultures of strain CBS 12357<sup>T</sup> (Figure 4). Brewing-related characteristics of IMS0750  
327 were further explored by analyzing production of aroma-defining esters, higher alcohols and diacetyl.  
328 Final concentrations of esters and higher alcohols were not significantly different in cultures of the  
329 two strains, with the exception of isoamylacetate, which showed a 240 % higher concentration in  
330 strain IMS0750 (Table 1). In addition, while the concentration of the off-flavour diacetyl remained  
331 above its taste threshold of 25 µg L<sup>-1</sup> after 333h for CBS 12357<sup>T</sup>, it dropped below 10 µg L<sup>-1</sup> for  
332 IMS0750 (Table 1).

333 **Table 1: Concentrations of alcohols, esters and diacetyl after fermentation of wort with a gravity of**  
334 **16.6 °P by *S. eubayanus* strains CBS 12357<sup>T</sup> and IMS0750.** The data correspond to the last time point

335 (330 h) of the fermentations shown in Figure 4. The average and average deviation of duplicate  
336 fermentations are shown for each strain.

| Compound       | Unit               | CBS 12357 <sup>T</sup> | IMS0750     |
|----------------|--------------------|------------------------|-------------|
| Methanol       | mg L <sup>-1</sup> | 3.3 ± 0.3              | 3.7 ± 0.3   |
| Propanol       | mg L <sup>-1</sup> | 23.7 ± 2.1             | 24.1 ± 0.9  |
| Isobutanol     | mg L <sup>-1</sup> | 48.5 ± 2.4             | 42.9 ± 7.2  |
| Amyl alcohol   | mg L <sup>-1</sup> | 138.5 ± 9.0            | 155.9 ± 6.4 |
| Diacetyl       | μg L <sup>-1</sup> | 43.8 ± 22.9            | 7.5 ± 0.2   |
| Ethylacetate   | mg L <sup>-1</sup> | 24.5 ± 5.5             | 26.1 ± 0.8  |
| Isoamylacetate | mg L <sup>-1</sup> | 1.4 ± 0.6              | 3.1 ± 0.3   |

337

## 338 Discussion

339 UV mutagenesis and subsequent laboratory evolution in maltotriose-limited chemostat  
340 cultures yielded *S. eubayanus* strains that were able to ferment maltotriose in laboratory-scale wort  
341 fermentation experiments. Whole genome sequencing of the mutants before and after the  
342 emergence of maltotriose utilization in wort resulted in the identification of several recombinations  
343 affecting subtelomeric regions. All four maltose transporter genes in *S. eubayanus* CBS 12357<sup>T</sup> are  
344 localized in subtelomeric *MAL* loci: *SeMALT1* on chromosome II, *SeMALT2* on chromosome V,  
345 *SeMALT3* on chromosome XIII and *SeMALT4* on chromosome XVI (9, 18). In the evolved strain  
346 IMS0750, a complex recombination between the subtelomeric regions of chromosomes II, XIII and  
347 XVI involved at least three of these *MAL* loci. Long-read nanopore sequencing enabled complete  
348 reconstruction of the recombined left arm of chromosome XVI, revealing recombinations between  
349 the ORFs of at least *SeMALT1*, *SeMALT3* and *SeMALT4*. These recombinations occurred within the  
350 open reading frame of *SeMALT4* and the newly-formed chimeric ORF *SeMALT413* encoded a full  
351 length protein with a structure comparable to that of *SeMalt* transporters. In contrast to the original  
352 *SeMALT* genes, overexpression of *SeMALT413* enabled growth on maltotriose, indicating that  
353 *SeMalt413* acquired the ability to import maltotriose. While the emergence of a new ORF by  
354 recombination has been observed previously between the *TLO* genes of *C. albicans*, it was not

355 associated with a new gene function (37). In contrast, the emergence of *SeMALT413* is an example of  
356 gene neofunctionalization, which occurred by recombination within genes of the subtelomeric *MALT*  
357 family.

358 Neofunctionalization by *in vivo* formation of chimeric sequences is reminiscent of the *in vitro*  
359 protein engineering strategy known as gene shuffling or gene fusion (65, 66). Gene shuffling involves  
360 randomized assembly of diverse DNA sequences into chimeric genes, followed by screening for novel  
361 or improved functions. Analogously to *in vitro* gene shuffling, the complex protein remodeling caused  
362 by *in vivo* formation of chimeric sequences may be particularly potent for protein  
363 neofunctionalization (67). The demonstration of neofunctionalization of a sugar transporter in *S.*  
364 *eubayanus* by *in vivo* gene shuffling supports the notion that gene fusion is an essential driver of  
365 evolution by accelerating the emergence of new enzymatic functions (68). Moreover, analysis of the  
366 *SpMTY1* maltotriose transporter gene revealed a chimeric structure similar to that of *SeMALT413*,  
367 albeit with alternating sequence identity with *ScMAL31*, *SeMALT* and *SparMAL31*. While sequences  
368 from *S. cerevisiae* and *S. eubayanus* were already present in the genome of *S. pastorianus*, the  
369 presence of sequences from *S. paradoxus* is plausible as introgressions from *S. paradoxus* were  
370 commonly found in a wide array of *S. cerevisiae* strains (31). particularly Therefore, the sequence of  
371 *SpMTY1* could have resulted from *in vivo* gene shuffling between genes from the *MALT* family,  
372 followed by accumulation of mutations. The emergence of *SeMALT413* could therefore be  
373 representative of the emergence of maltotriose utilization during the evolution of *S. pastorianus*.

374 No evidence of reciprocal translocations between *SeMALT1*, *SeMALT3* and *SeMALT4* was  
375 found in the genome of IMS0750, indicating genetic introgression via non-conservative  
376 recombinations. Such introgressions can occur during repair of double strand breaks by strand  
377 invasion of a homologous sequence provided by another chromosome and resection (69), leading to  
378 localized gene conversion and loss of heterozygosity. This model, which was proposed to explain  
379 local loss of heterozygosity of two orthologous genes in an *S. cerevisiae* x *S. uvarum* hybrid (69),  
380 provides a plausible explanation of the emergence of *SeMALT413* through non-reciprocal



381 recombination between paralogous *SeMALT* genes in *S. eubayanus*. The mosaic sequence  
382 composition of the resulting transporter gene suggests that neofunctionalization required multiple  
383 successive introgression events. As a result of these genetic introgressions, the *SeMALT4* gene was  
384 lost. The fact that IMS0750 harbored two copies of *SeMALT413* and no copy of *SeMALT4* indicates a  
385 duplication of the newly-formed ORF at the expense of *SeMALT4* via loss of heterozygosity. As  
386 functional-redundancy enables the accumulation of mutation without losing original functions (35,  
387 37, 38, 70), the loss of *SeMALT4* was likely facilitated by the presence of the functionally-redundant  
388 maltose transporter *SeMALT2* (9). The observation that introgressions were only found at *SeMALT4*  
389 may be due to the low number of tested mutants. However, it should be noted that introgressions in  
390 the *SeMALT1* and *SeMALT3* ORF's would have been unlikely to be beneficial, since these genes are  
391 not expressed in CBS 12357<sup>T</sup> (9).

392         This study illustrates the role of the rapid evolution of subtelomeric genes in adaptation to  
393 environmental changes. In addition, the newly-acquired ability of *SeMALT413* to transport  
394 maltotriose constitutes an example of evolution by gene neofunctionalization in the laboratory  
395 environment. The emergence of new functions is critical for the process of evolution. *A posteriori*  
396 analysis of existing gene families has provided insights on their evolutionary history and on the  
397 emergence of new functions. For example, the  $\alpha$ -glucosidase genes from the *MALS* family emerged  
398 by expansion of an ancestral pre-duplication gene with maltose-hydrolase activity and trace  
399 isomaltose-hydrolase activity. The evolution of *MALS* isomaltase genes from this ancestral gene is an  
400 example of subfunctionalization: the divergent evolution of two gene copies culminating in their  
401 specialization for distinct functions which were previously present to a lesser extent in the ancestral  
402 gene. The generation of functional redundancy by gene duplication is critical to this process as it  
403 enables mutations to occur which result in loss of the original gene function without engendering a  
404 selective disadvantage (35, 37, 38, 40, 41, 70). In contrast to subfunctionalization,  
405 neofunctionalization consists of the emergence of a function which was completely absent in the  
406 ancestral gene (45). While the emergence of many genes from a large array of organisms has been

407 ascribed to subfunctionalization and to neofunctionalization, these conclusions were based on a  
408 *posteriori* analysis of processes which had already occurred, and not on their experimental  
409 observation (35, 37, 43-47). Here we present clear experimental evidence of neofunctionalization  
410 within a laboratory evolution experiment. Furthermore, while *ex-vivo* engineering of the  
411 subtelomeric *FLO* genes had already shown that recombinations within subtelomeric gene families  
412 can alter their function (44), the ability of *SeMALT413* to transport maltotriose proves that such *in*  
413 *vivo* gene shuffling is relevant for evolutionary biology.

414         While the introduction of *SeMALT413* in CBS 12357<sup>T</sup> via genetic engineering demonstrated its  
415 neofunctionalization, the use of GMO-strains is precluded in the brewing industry by customer  
416 acceptance issues (71). However, the non-GMO evolved *S. eubayanus* isolate IMS0750 could be  
417 tested on industrial brewing wort at 7 L scale. In addition to near-complete maltotriose conversion,  
418 the maltose consumption, isoamylacetate production and diacetyl degradation of IMS0750 were  
419 superior to CBS 12357<sup>T</sup>. Efficient maltose and maltotriose consumption, as well as the concomitantly  
420 increased ethanol production, are important factors determining the economic profitability of beer  
421 brewing processes (72). In addition, low residual sugar concentration, low concentrations of diacetyl  
422 and high concentrations of Isoamylacetate are desirable for the flavor profile of beer (73, 74). In  
423 terms of application, the laboratory evolution approach for conferring maltotriose utilization into *S.*  
424 *eubayanus* presented in this paper is highly relevant in view of the recent introduction of this species  
425 in industrial-scale brewing processes (9). The ability to ferment maltotriose can be introduced into  
426 other natural isolates of *S. eubayanus*, either by laboratory evolution or by crossing with evolved  
427 strains such as *S. eubayanus* IMS0750. Besides their direct application for brewing, maltotriose-  
428 consuming *S. eubayanus* strains are of value for the generation of laboratory-made hybrid  
429 *Saccharomyces* strains for brewing and other industrial applications (8, 75-77).

## 430 **Materials and methods**

### 431 **Strains and maintenance**

432 All yeast strains used and generated in this study are listed in Table 2. *S. eubayanus* type strain CBS  
 433 12357<sup>T</sup> (1) and *S. pastorianus* strain CBS 1483 (60, 78) were obtained from the Westerdijk Fungal  
 434 Biodiversity Institute (Utrecht, the Netherlands). Stock cultures were grown in YPD, containing 10 g  
 435 L<sup>-1</sup> yeast extract, 20 g L<sup>-1</sup> peptone and 20 g L<sup>-1</sup> glucose, at 20 °C until late exponential phase,  
 436 complemented with sterile glycerol to a final concentration of 30% (v/v) and stored at -80 °C until  
 437 further use.

438 **Table 2: *Saccharomyces* strains used during this study**

| Name      | Species               | Relevant genotype                                                  | Origin     |
|-----------|-----------------------|--------------------------------------------------------------------|------------|
| CBS 12357 | <i>S. eubayanus</i>   | Wildtype diploid                                                   | (1)        |
| IMS0637   | <i>S. eubayanus</i>   | Evolved strain derived from CBS 12357                              | This study |
| IMS0638   | <i>S. eubayanus</i>   | Evolved strain derived from CBS 12357                              | This study |
| IMS0639   | <i>S. eubayanus</i>   | Evolved strain derived from CBS 12357                              | This study |
| IMS0640   | <i>S. eubayanus</i>   | Evolved strain derived from CBS 12357                              | This study |
| IMS0641   | <i>S. eubayanus</i>   | Evolved strain derived from CBS 12357                              | This study |
| IMS0642   | <i>S. eubayanus</i>   | Evolved strain derived from CBS 12357                              | This study |
| IMS0643   | <i>S. eubayanus</i>   | Evolved strain derived from CBS 12357                              | This study |
| IMS0750   | <i>S. eubayanus</i>   | Evolved strain derived from CBS 12357                              | This study |
| IMS0751   | <i>S. eubayanus</i>   | Evolved strain derived from CBS 12357                              | This study |
| IMS0752   | <i>S. eubayanus</i>   | Evolved strain derived from CBS 12357                              | This study |
| IMX1941   | <i>S. eubayanus</i>   | $\Delta$ <i>Sesga1::ScTEF1p-SeMALT2-ScCYC1t</i>                    | This study |
| IMX1942   | <i>S. eubayanus</i>   | $\Delta$ <i>Sesga1::ScTEF1p-SeMALT413-ScCYC1t</i>                  | This study |
| CBS 1483  | <i>S. pastorianus</i> | Group II brewer's yeast, Brewery Heineken, bottom yeast, July 1927 | (78)       |

439

### 440 **Media and cultivation**

441 Plasmids were propagated overnight in *Escherichia coli* XL1-Blue cells in 10 mL LB medium containing  
 442 10 g L<sup>-1</sup> peptone, 5 g L<sup>-1</sup> Bacto Yeast extract, 5 g L<sup>-1</sup> NaCl and 100 mg L<sup>-1</sup> ampicillin at 37 °C. Synthetic  
 443 medium (SM) contained 3.0 g L<sup>-1</sup> KH<sub>2</sub>PO<sub>4</sub>, 5.0 g L<sup>-1</sup> (NH<sub>4</sub>)<sub>2</sub>SO<sub>4</sub>, 0.5 g L<sup>-1</sup> MgSO<sub>4</sub>, 7 H<sub>2</sub>O, 1 mL L<sup>-1</sup> trace  
 444 element solution, and 1 mL L<sup>-1</sup> vitamin solution (61), and was supplemented with 20 g L<sup>-1</sup> glucose  
 445 (SMG), maltose (SMM) or maltotriose (SMMt) by addition of autoclaved 50% w/v sugar solutions.  
 446 Maltotriose (95.8% purity) was obtained from Glentham Life Sciences, Corsham, United Kingdom.  
 447 Industrial wort was provided by HEINEKEN Supply Chain B.V., Zoeterwoude, the Netherlands. The  
 448 wort was supplemented with 1.5 mg L<sup>-1</sup> of Zn<sup>2+</sup> by addition of ZnSO<sub>4</sub>·7H<sub>2</sub>O, autoclaved for 30 min at  
 449 121°C and filtered using Nalgene 0.2 µm SFCA bottle top filters (Thermo Scientific, Waltham, MA)

450 prior to use. Where indicated, filtered wort was diluted with sterile demineralized water. Solid media  
451 were supplemented with 20 g L<sup>-1</sup> of Bacto agar (Becton Dickinson, Breda, The Netherlands). *S.*  
452 *eubayanus* strains transformed with plasmids pUDP052 (gRNA<sub>SeSGA1</sub>) were selected on medium in  
453 which (NH<sub>4</sub>)<sub>2</sub>SO<sub>4</sub> was replaced by 5 g L<sup>-1</sup> K<sub>2</sub>SO<sub>4</sub> and 10 mM acetamide (SM<sub>AceG</sub>: SMG) (79).

#### 454 **Shake-flask cultivation**

455 Shake-flask cultures were grown in 500 mL shake flasks containing 100 mL medium and inoculated  
456 from stationary-phase aerobic precultures to an initial OD<sub>660</sub> of 0.1. Inocula for growth experiments  
457 on SMMt were grown on SMM. In other cases, media for growth experiments and inoculum  
458 preparation were the same. Shake flasks were incubated at 20 °C and 200 RPM in a New Brunswick  
459 Innova43/43R shaker (Eppendorf Nederland B.V., Nijmegen, The Netherlands). Samples were taken  
460 at regular intervals to determine OD<sub>660</sub> and extracellular metabolite concentrations.

#### 461 **Microaerobic growth experiments**

462 Microaerobic cultivation was performed in 250 mL airlock-capped Neubor infusion bottles (38 mm  
463 neck, Dijkstra, Lelystad, Netherlands) containing 200 mL 3-fold diluted wort supplemented with 0.4  
464 mL L<sup>-1</sup> Pluronic antifoam (Sigma-Aldrich). Bottle caps were equipped with a 0.5 mm x 16 mm  
465 Microlance needle (BD Biosciences) sealed with cotton to prevent pressure build-up. Sampling was  
466 performed aseptically with 3.5 mL syringes using a 0.8 mm x 50 mm Microlance needle (BD  
467 Biosciences). Microaerobic cultures were inoculated at an OD<sub>660</sub> of 0.1 from stationary-phase  
468 precultures in 50 mL Bio-One Cellstar Cellreactor tubes (Sigma-Aldrich) containing 30 mL of the same  
469 medium, grown for 4 days at 12 °C. Bottles were incubated at 12 °C and shaken at 200 RPM in a New  
470 Brunswick Innova43/43R shaker. At regular intervals, 3.5 mL samples were collected in 24 deep-well  
471 plates (EnzyScreen BV, Heemstede, Netherlands) using a LiHa liquid handler (Tecan, Männedorf,  
472 Switzerland) to measure OD<sub>660</sub> and external metabolites. 30 µL of each sample was diluted 5 fold in  
473 demineralized water in a 96 well plate and OD<sub>660</sub> was measured with a Magellan Infinite 200 PRO  
474 spectrophotometer (Tecan, Männedorf, Switzerland). From the remaining sample, 150 µL was

475 vacuum filter sterilized using 0.2  $\mu\text{m}$  Multiscreen filter plates (Merck, Darmstadt, Germany) for HPLC  
476 measurements.

#### 477 **7-L wort fermentation cultivations**

478 Batch cultivations under industrial conditions were performed in 10 L stirred stainless-steel  
479 fermenters containing 7 L of 16.6 °Plato wort. Fermentations were inoculated to a density of  $5 \times 10^6$   
480 cells  $\text{mL}^{-1}$  at 8 °C . The temperature was raised during 48 hours to 11 °C and increased to 14 °C as  
481 soon as the gravity was reduced to 6.5 °Plato. Samples were taken daily during weekdays and the  
482 specific gravity and alcohol content were measured using an Anton Paar density meter (Anton Paar  
483 GmbH, Graz, Austria).

#### 484 **Adaptive Laboratory Evolution**

##### 485 **UV mutagenesis and selection**

486 *S. eubayanus* CBS 12357<sup>T</sup> was grown in a 500 mL shake flask containing 100 mL SMG at 20 °C until  
487 stationary phase and diluted to an  $\text{OD}_{660}$  of 1.0 with demineralized water. 50 mL of the resulting  
488 suspension was spun down at 4816 g for 5 min and washed twice with demineralized water. 25 mL of  
489 washed cells was poured into a 100 mm x 15 mm petri dish (Sigma-Aldrich) without lid and irradiated  
490 with a UV lamp (TUV 30 W T8, Philips, Eindhoven, The Netherlands) at a radiation peak of 253.7 nm.  
491 25 mL of non-mutagenized and 5 mL of mutagenized cells were kept to determine survival rate. From  
492 both samples, a 100-fold dilution was made, from which successive 10-fold dilutions were made  
493 down to a 100,000-fold dilution. Then, 100  $\mu\text{L}$  of each dilution was plated on YPD agar and the  
494 number of colonies were counted after incubation during 48h at room temperatures. After 10,000-  
495 fold dilution, 182 colonies formed from the non-mutagenized cells against 84 colonies for the  
496 mutagenized cells, indicating a survival rate of 46%. The remaining 20 mL of mutagenized cells was  
497 spun down at 4816 g for 5 min and resuspended in 1 mL demineralized water. Mutagenized cells  
498 were added to a 50 mL shake flask containing 9 mL SMMt and incubated for 21 days at 20 °C and 200  
499 RPM. Maltotriose concentrations were analyzed at day 0, 19 and 21. After 21 days, two 100  $\mu\text{L}$

500 samples were transferred to fresh shake flasks containing SMMt and incubated until stationary  
501 phase. At the end of the second transfer, single cell isolates were obtained using the BD FACSAria™ II  
502 SORP Cell Sorter (BD Biosciences, Franklin Lakes, NJ) equipped with a 488 nm laser and a 70 µm  
503 nozzle, and operated with filtered FACSFlow™ (BD Biosciences). Cytometer performance was  
504 evaluated by running a CST cycle with CS&T Beads (BD Biosciences). Drop delay for sorting was  
505 determined by running an Auto Drop Delay cycle with Accudrop Beads (BD Biosciences). Cell  
506 morphology was analysed by plotting forward scatter (FSC) against side scatter (SSC). Gated single  
507 cells were sorted into a 96 well microtiter plates containing SMMt using a “single cell” sorting mask ,  
508 corresponding to a yield mask of 0, a purity mask of 32 and a phase mask of 16. The 96 well plates  
509 were incubated for 96 h at room temperature in a GENios Pro micro plate spectrophotometer  
510 (Tecan, Männedorf, Switzerland), during which period growth was monitored as OD<sub>660</sub>. After 96 h,  
511 biomass in each well was resuspended using a sterile pin replicator and the final OD<sub>660</sub> was  
512 measured. The 7 isolates with the highest final OD<sub>660</sub> were picked, restreaked and stocked as isolates  
513 IMS0637-643. PCR amplification of the *S. eubayanus*-specific *SeFSY1* gene and ITS sequencing  
514 confirmed that all 7 isolates were *S. eubayanus*.

#### 515 **Laboratory evolution in chemostats**

516 Chemostat cultivation was performed in Multifors 2 Mini Fermenters (INFORS HT, Velp, The  
517 Netherlands) equipped with a level sensor to maintain a constant working volume of 100 mL. The  
518 culture temperature was controlled at 20 °C and the dilution rate was set at 0.03 h<sup>-1</sup> by controlling  
519 the medium inflow rate. Cultures were grown on 6-fold diluted wort supplemented with 10 g L<sup>-1</sup>  
520 additional maltotriose (Glentham Life Sciences), 0.2 mL L<sup>-1</sup> anti-foam emulsion C (Sigma-Aldrich,  
521 Zwijndrecht, the Netherlands), 10 mg L<sup>-1</sup> ergosterol, 420 mg L<sup>-1</sup> Tween 80 and 5 g L<sup>-1</sup> ammonium  
522 sulfate. Tween 80 and ergosterol were added as a solution as described previously (61). IMS0637-  
523 IMS0643 were grown overnight at 20 °C and 200 RPM in separate shake flasks on 3-fold diluted wort.  
524 The OD<sub>660</sub> of each strain was measured and the equivalent of 7 mL at an OD<sub>660</sub> of 20 from each strain  
525 was pooled in a total volume of 50 mL. The reactor was inoculated by adding 20 mL of the pooled

526 culture. After overnight growth, the medium inflow pumps were turned on and the fermenter was  
527 sparged with 20 mL min<sup>-1</sup> of nitrogen gas and stirred at 500 RPM. The pH was not adjusted. Samples  
528 were taken weekly. Due to a technical failure on the 63<sup>rd</sup> day, the chemostat was autoclaved, cleaned  
529 and restarted using a sample taken on the same day. After a total of 122 days, the chemostat was  
530 stopped and 10 single colony isolates were sorted onto SMMt agar using FACS, as for IMS0637-  
531 IMS0643. PCR amplification of the *S. eubayanus* specific *SeFSY1* gene and ITS sequencing confirmed  
532 that all ten single-cell isolates were *S. eubayanus*. Three colonies were randomly picked, restreaked  
533 and stocked as IMS0750-752.

#### 534 **Genomic isolation and whole genome sequencing**

535 Yeast cultures were incubated in 50 mL Bio-One Cellstar Cellreactor tubes (Sigma-Aldrich) containing  
536 liquid YPD medium at 20°C on an orbital shaker set at 200 RPM until the strains reached stationary  
537 phase with an OD<sub>660</sub> between 12 and 20. Genomic DNA for whole genome sequencing was isolated  
538 using the Qiagen 100/G kit (Qiagen, Hilden, Germany) according to the manufacturer's instructions  
539 and quantified using a Qubit® Fluorometer 2.0 (Thermo Scientific).

540 Genomic DNA of the strains CBS 12357<sup>T</sup> and IMS0637-IMS0643 was sequenced by Novogene  
541 Bioinformatics Technology Co., Ltd (Yuen Long, Hong Kong) on a HiSeq2500 sequencer (Illumina, San  
542 Diego, CA) with 150 bp paired-end reads using PCR-free library preparation. Genomic DNA of the  
543 strains IMS0750 and IMS0752 was sequenced in house on a MiSeq sequencer (Illumina) with 300 bp  
544 paired-end reads using PCR-free library preparation. All reads are available at NCBI  
545 (<https://www.ncbi.nlm.nih.gov/>) under the bioproject accession number PRJNA492251.

546 Genomic DNA of strains IMS0637 and IMS0750 was sequenced on a Nanopore MinION (Oxford  
547 Nanopore Technologies, Oxford, United Kingdom). Libraries were prepared using 1D-ligation (SQK-  
548 LSK108) as described previously (80) and analysed on FLO-MIN106 (R9.4) flow cell connected to a  
549 MinION Mk1B unit (Oxford Nanopore Technology). MinKNOW software (version 1.5.12; Oxford  
550 Nanopore Technology) was used for quality control of active pores and for sequencing. Raw files

551 generated by MinKNOW were base called using Albacore (version 1.1.0; Oxford Nanopore  
552 Technology). Reads with a minimum length of 1000 bp were extracted in fastq format. All reads are  
553 available at NCBI (<https://www.ncbi.nlm.nih.gov/>) under the bioproject accession number  
554 PRJNA492251.

### 555 **Genome analysis**

556 For the strains CBS 12357<sup>T</sup>, IMS0637-IMS0643, IMS0750 and IMS0752, the raw Illumina reads were  
557 aligned against a chromosome-level reference genome of CBS 12357<sup>T</sup> (NCBI accession number  
558 PRJNA450912, <https://www.ncbi.nlm.nih.gov/>) (9) using the Burrows–Wheeler Alignment tool  
559 (BWA), and further processed using SAMtools and Pilon for variant calling (81-83). Heterozygous SNPs  
560 and INDELS which were heterozygous in CBS 12357<sup>T</sup> were disregarded. Chromosomal translocations  
561 were detected using Breakdancer (84). Only translocations which were supported by at least 10% of  
562 the reads aligned at that locus were considered. Chromosomal copy number variation was estimated  
563 using Magnolya (85) with the gamma setting set to “none” and using the assembler ABySS (v 1.3.7)  
564 with a k-mer size of 29 (86). All SNPs, INDELS, recombinations and copy number changes were  
565 manually confirmed by visualising the generated .bam files in the Integrative Genomics Viewer (IGV)  
566 software (87). The complete list of identified mutations can be found in Supplementary Data File 1.

567 For strains IMS0637 and IMS0750, the nanopore sequencing reads were assembled de novo using  
568 Canu (version 1.3) (88) with `-genomesize` set to 12 Mbp. Assembly correctness was assessed using  
569 Pilon (83), and sequencing/assembly errors were polished by aligning Illumina reads with BWA (81)  
570 using correction of only SNPs and short indels (`-fix bases` parameter). Long sequencing reads of  
571 IMS0637 and IMS0750 were aligned to the obtained reference genomes and to the reference  
572 genome of CBS 12357<sup>T</sup> using minimap2 (89). The genome assemblies for IMS0637 and IMS0750 are  
573 available at NCBI (<https://www.ncbi.nlm.nih.gov/>) under the bioproject accession number  
574 PRJNA492251.



575 **Molecular biology methods**

576 For colony PCR and Sanger sequencing, a suspension containing genomic DNA was prepared by  
577 boiling biomass from a colony in 10  $\mu$ L 0.02 M NaOH for 5 min, and spinning cell debris down at  
578 13,000 g. To verify isolates belonged to the *S. eubayanus* species, the presence of *S. eubayanus*-  
579 specific gene *SeFSY1* and the absence of *S. cerevisiae*-specific gene *ScMEX67* was tested by DreamTaq  
580 PCR (Thermo Scientific) amplification using primer pair 8572/8573 (90), and primer pair 8570/8571  
581 (91), respectively. Samples were loaded on a 1% agarose gel containing SYBR Green DNA stain  
582 (Thermo Scientific). GeneRuler DNA Ladder Mix (Thermo Scientific) was used as ladder and gel was  
583 run at a constant 100V for 20 min. DNA bands were visualized using UV light. For additional  
584 confirmation of the *S. eubayanus* identity, ITS regions were amplified using Phusion High-Fidelity  
585 DNA polymerase (Thermo Scientific) and primer pair 10199/10202. The purified (GenElute PCR  
586 Cleanup Kit, Sigma-Aldrich) amplified fragments were Sanger sequenced (BaseClear, Leiden,  
587 Netherlands) (92). Resulting sequences were compared using BLAST to available ITS sequences of  
588 *Saccharomyces* species and classified as the species to which the amplified region had the highest  
589 sequence identity. The presence of the *SeMALT* genes was verified by using Phusion High-Fidelity  
590 DNA polymerase and gene specific primers: 10491/10492 for *SeMALT1*, 10632/10633 for *SeMALT2*  
591 and *SeMALT4/2*, 10671/10672 for *SeMALT3*, 10491/10671 for *SeMALT13*, and 10633/10671 for  
592 *SeMALT413*. The amplified fragments were purified using the GenElute PCR Cleanup Kit (Sigma-  
593 Aldrich) and Sanger sequenced (BaseClear) using the same primers used for amplification.

594 **Plasmid construction**

595 All plasmids and primers used in this study are listed in Table 3 and Supplementary Table S1,  
 596 respectively. DNA amplification for plasmid and strain construction was performed using Phusion  
 597 High-Fidelity DNA polymerase (Thermo Scientific) according to the supplier's instructions. The coding  
 598 region of *SeMALT413* was amplified from genomic DNA of IMS0750 with primer pair 10633/10671.  
 599 Each primer carried a 40 bp extension complementary to the plasmid backbone of p426-TEF-amdS  
 600 (13), which was PCR amplified using primer pair 7812/5921. The transporter fragment and the p426-  
 601 TEF-amdS backbone fragment were assembled (93) using NEBuilder HiFi DNA Assembly (New  
 602 England Biolabs, Ipswich, MA), resulting in plasmid pUD814. The resulting pUD814 plasmid was  
 603 verified by Sanger sequencing, which confirmed that its *SeMALT413* ORF was identical to the  
 604 recombinant ORF found in the nanopore assembly of IMS0750 (Figure 2C).

605

606 **Table 3: Plasmids used during this study**

| Name          | Relevant genotype                                                                                                                                                                                                                          | Source     |
|---------------|--------------------------------------------------------------------------------------------------------------------------------------------------------------------------------------------------------------------------------------------|------------|
| pUDP052       | <i>ori</i> (ColE1) <i>bla</i> panARSopt <i>amdSYM</i> <i>ScTDH3</i> <sub>pr</sub> -gRNA <sub>SeSGA1</sub> - <i>ScCYC1</i> <sub>ter</sub> <i>AaTEF1</i> <sub>pr</sub> - <i>Spcas9</i> <sup>D147Y P411T</sup> - <i>ScPHO5</i> <sub>ter</sub> | (9)        |
| pUDE044       | <i>ori</i> (ColE1) <i>bla</i> 2μ <i>ScTDH3</i> <sub>pr</sub> - <i>ScMAL12</i> - <i>ScADH1</i> <sub>ter</sub> <i>URA3</i>                                                                                                                   | (94)       |
| p426-TEF-amdS | <i>ori</i> (ColE1) <i>bla</i> 2μ <i>amdSYM</i> <i>ScTEF1</i> <sub>pr</sub> - <i>ScCYC1</i> <sub>ter</sub>                                                                                                                                  | (13)       |
| pUD479        | <i>ori</i> (ColE1) <i>bla</i> 2μ <i>amdSYM</i> <i>ScTEF1</i> <sub>pr</sub> - <i>SeMALT1</i> - <i>ScCYC1</i> <sub>ter</sub>                                                                                                                 | (9)        |
| pUD480        | <i>ori</i> (ColE1) <i>bla</i> 2μ <i>amdSYM</i> <i>ScTEF1</i> <sub>pr</sub> - <i>SeMALT2</i> - <i>ScCYC1</i> <sub>ter</sub>                                                                                                                 | (9)        |
| pUD814        | <i>ori</i> (ColE1) <i>bla</i> 2μ <i>amdSYM</i> <i>ScTEF1</i> <sub>pr</sub> - <i>SeMALT413</i> - <i>ScCYC1</i> <sub>ter</sub>                                                                                                               | This study |

607

### 608 Strain construction

609 To integrate and overexpress *SeMALT2* and *SeMALT413* ORFs in *S. eubayanus* CBS 12357<sup>T</sup>, *SeMALT2*  
 610 and *SeMALT413* were amplified from pUD480 and pUD814 respectively with primers 13559/13560  
 611 that carried a 40 bp region homologous to each flank of the *SeSGA1* gene located on *S. eubayanus*  
 612 chromosome IX. To facilitate integration, the PCR fragments were co-transformed with the plasmid  
 613 pUDP052 that expressed *Spcas9*<sup>D147Y P411T</sup> (95, 96) and a gRNA targeting *SeSGA1* (9). The strain  
 614 IMX1941 was constructed by transforming CBS 12357<sup>T</sup> with 1 μg of the amplified *SeMALT2*  
 615 expression cassette and 500 ng of plasmid pUDP052 by electroporation as described previously (96).  
 616 Transformants were selected on SM<sub>Acc</sub>G plates. Similarly, IMX1942 was constructed by transforming

617 CBS 12357<sup>T</sup> with 1 µg of the amplified *SeMALT413* expression cassette for *SeMALT413* instead of  
618 *SeMALT2*. Correct integration was verified by diagnostic PCR with primer pair 12635/12636  
619 (Supplementary Figure S8). All PCR-amplified gene sequences were Sanger sequenced (BaseClear).

## 620 **Protein structure prediction**

621 Homology modeling of the *SeMalt413* transporter was performed using the SWISS-MODEL server  
622 (<https://swissmodel.expasy.org/>) (97). The translated amino acid sequence of *SeMALT413* was used  
623 as input (Supplementary Figure S3). The model of the xylose proton symporter XylE (PDB: 4GBY) was  
624 chosen as template (62). Models were built based on the target-template alignment using ProMod3.  
625 Coordinates which are conserved between the target and the template are copied from the template  
626 to the model. Insertions and deletions are remodeled using a fragment library. Side chains are then  
627 rebuilt. Finally, the geometry of the resulting model is regularized by using a force field. In case loop  
628 modelling with ProMod3 fails, an alternative model is built with PROMOD-II (98). 3D model was  
629 assessed and colored using Pymol (The PyMOL Molecular Graphics System, Version 2.1.1  
630 Schrödinger, LLC.).

## 631 **Sequence analysis of *SpMTY1***

632 The sequence of *SpMTY1* was analyzed by aligning *ScMAL31*, *ScAGT1*, *ScMPH2* and *ScMPH3* from *S.*  
633 *cerevisiae* strain S288C (63) and *SeMALT1*, *SeMALT2*, *SeMALT3*, *SeMALT4* from *S. eubayanus* strain  
634 CBS 12357<sup>T</sup> (9) to the sequence of *SpMTY1* from *S. pastorianus* strain Weihenstephan 34/70 (22)  
635 using the Clone manager software (version 9.51, Sci-Ed Software, Denver, Colorado). The origin of  
636 nucleotides 969 to 1,639 of *SpMTY1* was further investigated using the blastn function of NCBI  
637 (<https://www.ncbi.nlm.nih.gov/>). The sequence was aligned against *S. cerevisiae* S288C  
638 (taxid:559292) to identify closely related homologues. In addition, *SpMTY1* was aligned against the  
639 complete nucleotide collection. To avoid similarity with genomes harboring an *MTY1* gene,  
640 sequences from *S. pastorianus* (taxid:27292), *S. cerevisiae* (taxid:4932), *S. eubayanus*  
641 (taxid:1080349), *S. cerevisiae* x *eubayanus* (taxid:1684324) and *S. bayanus* (taxid:4931) were

642 excluded. The most significant alignment was with nucleotides 1,043,930 to 1,044,600 of  
643 chromosome VII of *S. paradoxus* strain YPS138 (GenBank: CP020282.1). As the most significant  
644 alignment of these nucleotides to *S. cerevisiae* S228C (taxid:559292) was *ScMAL31*, the gene was  
645 further referred to as *SparMAL31*.

#### 646 **Analytcs**

647 The concentrations of ethanol and of the sugars glucose, maltose and maltotriose were measured  
648 using a high pressure liquid chromatography (HPLC) Agilent Infinity 1260 series (Agilent Technologies,  
649 Santa Clara, CA) using a Bio-Rad Aminex HPX-87H column at 65 °C and a mobile phase of 5 mM  
650 sulfuric acid with a flow rate of 0.8 mL per minute. Compounds were measured using a RID at 35 °C.  
651 Samples were spun down (13,000 g for 5 min) to collect supernatant or 0.2 µm filter-sterilized before  
652 analysis. The concentrations of ethylacetate and isoamylacetate, methanol, propanol, isobutanol,  
653 isoamyl alcohol and diacetyl were determined as described previously (60).

654 **Acknowledgments**

655 We thank Jan-Maarten Geertman (Heineken Supply Chain B.V.) for his support during the study. This  
656 work was performed within the BE-Basic R&D Program (<http://www.be-basic.org/>), which was granted an  
657 FES subsidy from the Dutch Ministry of Economic Affairs, Agriculture and Innovation (EL&I).

658

659 **Figure Legends**

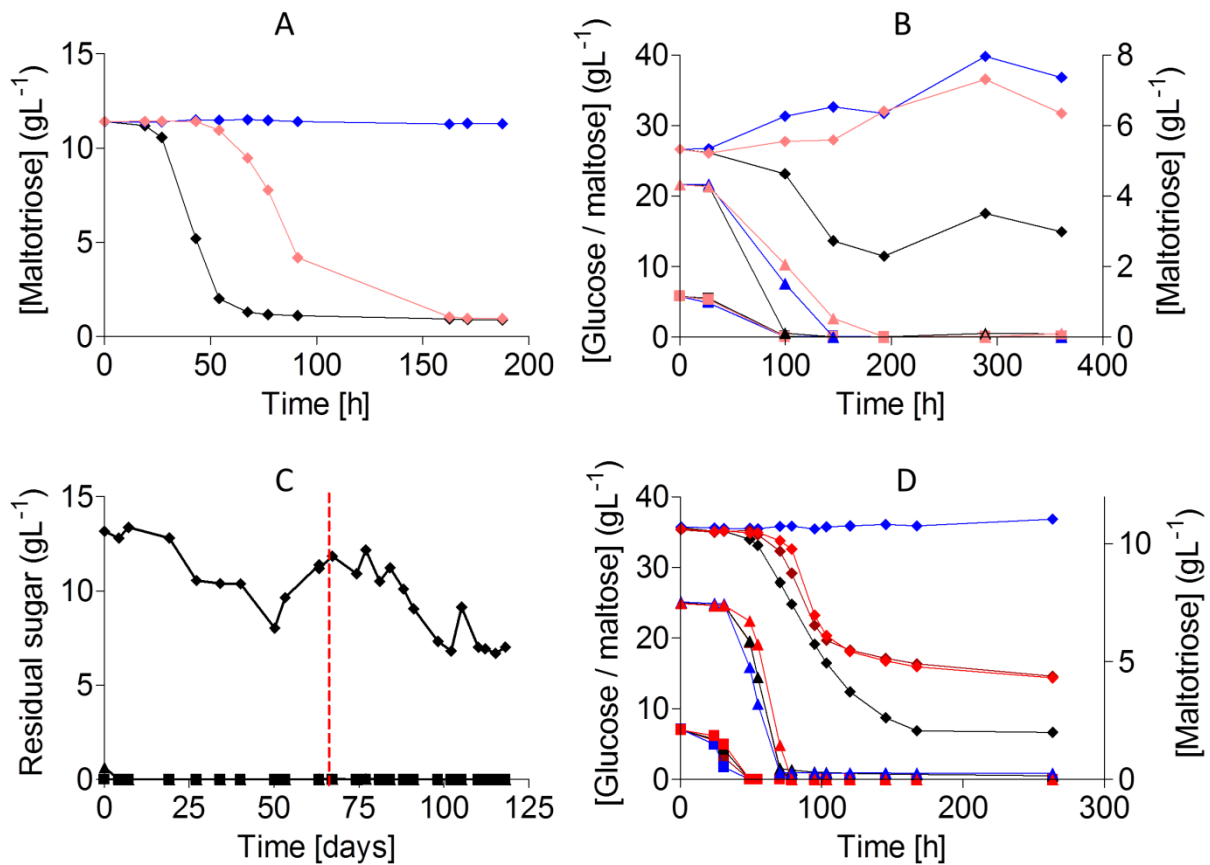

660

661 **Figure 1: Mutagenesis and evolution to obtain maltotriose consuming *S. eubayanus*.** (A)

662 Characterization of *S. pastorianus* CBS 1483(black), *S. eubayanus* CBS 12357<sup>T</sup>(blue) and IMS0637

663 (light red) on SMMt at 20 °C. The data for IMS0637 is representative for the other mutants IMS0638-

664 IMS0643 (Supplementary Figure S1). The average concentration of maltotriose (◆) and average

665 deviation were determined from two replicates. (B) Characterization of *S. pastorianus* CBS 1483

666 (black), *S. eubayanus* CBS 12357<sup>T</sup> (blue) and IMS0637 (light red) on wort at 20 °C. The concentrations

667 of (■) glucose, (▲) maltose and (◆) maltotriose were measured from single biological

668 measurements. (C) Residual maltotriose concentration in the outflow during laboratory evolution of

669 strains IMS0637-IMS0643 in an anaerobic chemostat at 20 °C on maltotriose enriched wort. The

670 concentrations of (■) glucose, (▲) maltose and (◆) maltotriose were measured by HPLC. The

671 chemostat was restarted after a technical failure (red dotted line). (D) Characterization of *S.*

672 *pastorianus* CBS 1483 (black), *S. eubayanus* CBS 12357<sup>T</sup> (blue), IMS0750 (red) and IMS0752 (light red)  
673 on wort at 12 °C in 250 mL micro-aerobic Neubor infusion bottles. The average concentration and  
674 standard deviation of (■) glucose, (▲) maltose and (◆) maltotriose were determined from three  
675 biological replicates.

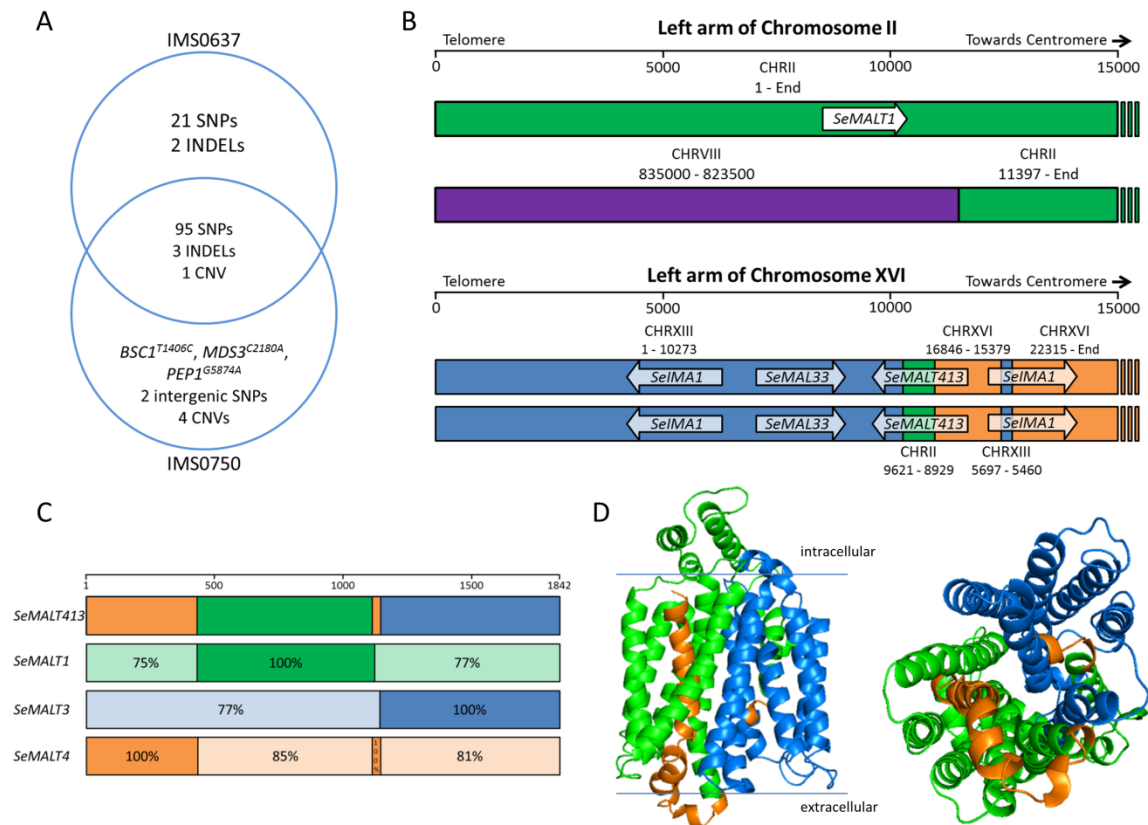

676

677 **Figure 2: Identification of mutations in the mutagenized strain IMS0637 and the evolved strain**

678 **IMS0750. (A)** Venn diagram of the mutations found in UV-mutagenized IMS0637 and evolved

679 IMS0750 relative to wildtype CBS 12357<sup>T</sup>. Single nucleotide polymorphisms (SNPs), small insertions

680 and deletions (INDELS) and copy number variation (CNV) are indicated as detected by Pilon. **(B)**

681 Recombined chromosome structures in IMS0637 and IMS0750 as detected by whole genome

682 sequencing using MinION nanopore technology and *de novo* genome assembly. The first 15,000

683 nucleotides of the left arm of CHRII and CHRXVI are represented schematically. The origin of the

684 sequence is indicated in green for CHRII, red for CHRVIII, blue for CHRXIII and orange for CHRXVI. In

685 addition, *SeMALT* transporter genes present on the sequence are indicated by arrows. While the

686 recombination of CHRII and CHRVIII was present in IMS0637 and IMS0750, the recombination of both

687 copies of CHRXVI was found only in IMS0750 but not in IMS0637. The recombination on CHRXVI

688 created the chimeric *SeMALT413* transporter gene. **(C)** Overview of the sequence similarity of the

689 1,842 nucleotides of *SeMALT413* relative to *SeMALT1*, *SeMALT3* and *SeMALT4*. The open reading



690 frames of the genes were aligned (Supplementary Figure S2) and regions with 100% sequence  
691 identity were identified. For regions in which the sequence identity was lower than 100%, the actual  
692 sequence identity is indicated for each *SeMALT* gene. The origin of the sequence is indicated in green  
693 for CHRII, red for CHRVIII, blue for CHRXIII and orange for CHRXVI. **(D)** Prediction of the protein  
694 structure of SeMalt413 with on the left side a transmembrane view and on the right a transport  
695 channel view. Domains originated from *S. eubayanus* SeMalt transporters are indicated by the colors  
696 orange (*SeMalt4* chromosome XVI), green (*SeMalt1* chromosome II) and blue (*SeMalt3* chromosome  
697 XIII).

698

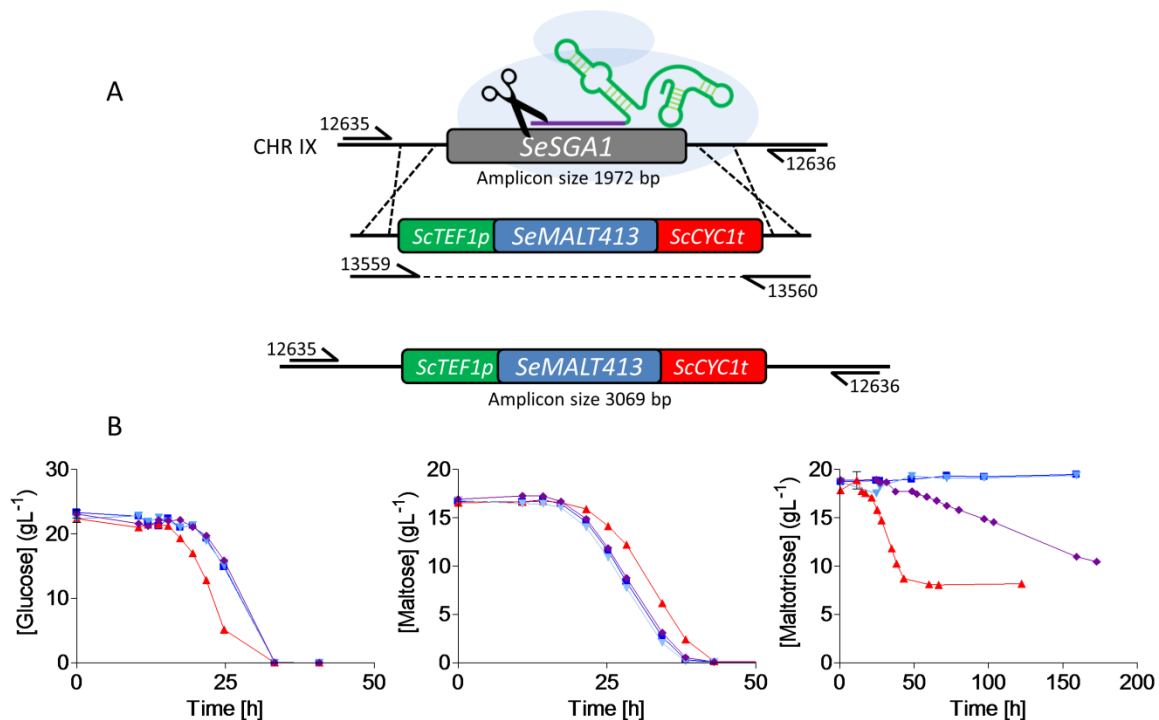

699

700 **Figure 3: Reverse engineering of *SeMALT413* in CBS 12357<sup>T</sup> and characterization of transporter**  
701 **functionality in SM. (A)** Representation of the CRISPR-Cas9 gRNA complex (after self-cleavage of the  
702 5' hammerhead ribozyme and a 3' hepatitis- $\delta$  virus ribozyme from the expressed gRNA) bound to the  
703 *SeSGA1* locus in CBS 12357<sup>T</sup>. Repair fragment with transporter cassette *ScTEF1p-ScMALT413-ScCYC1t*  
704 was amplified from pUD814(*SeMALT413*) with primers 13559/13560 and contains overhangs with  
705 the *SeSGA1* locus for recombination. *SeSGA1* was replaced by the *ScTEF1p-ScMALT413-ScCYC1t*  
706 cassette. Correct transformants were checked using primers 12635/12636 upstream and  
707 downstream of the *SeSGA1* locus (Supplementary Figure S5). Strains were validated using Sanger  
708 sequencing. (B) Characterization of (■) CBS 12357, (▲) IMS0750, (▼) IMX1941, (◆) IMX1942 on SM  
709 glucose, maltose and maltotriose. Strains were cultivated at 20 °C and culture supernatant was  
710 measured by HPLC. Data represent average and standard deviation of three biological replicates.

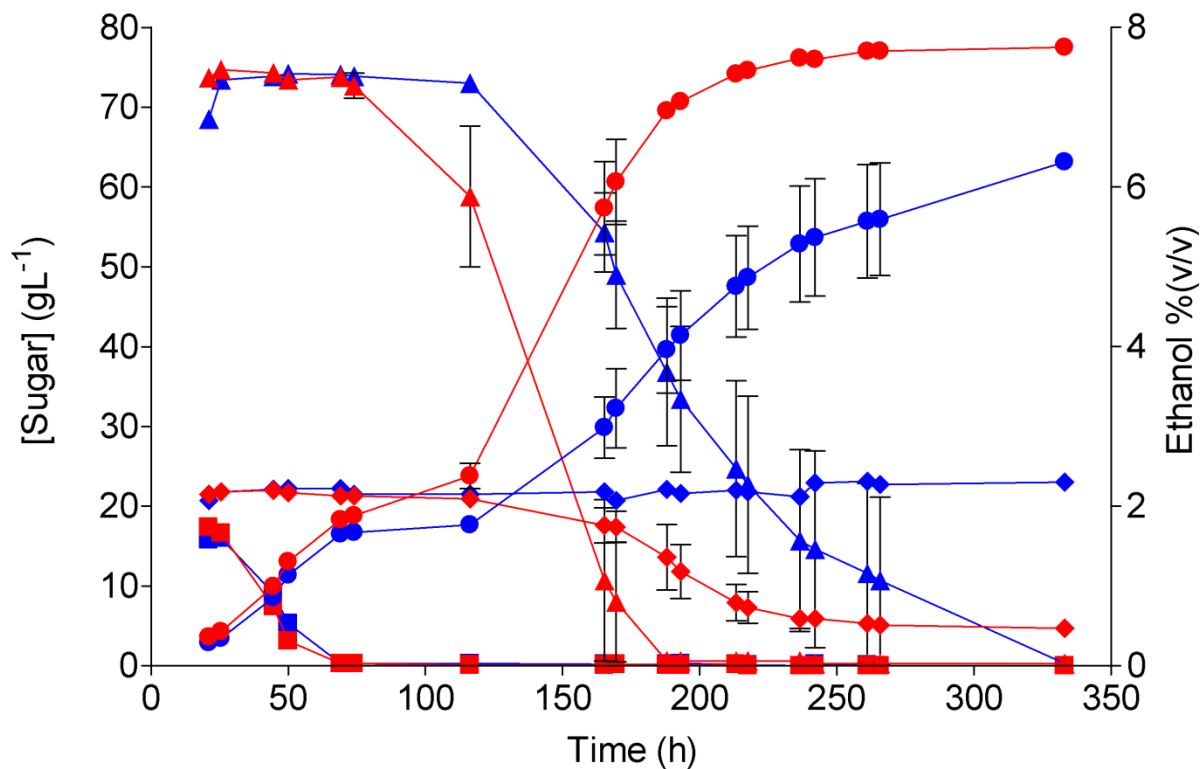

711

712 **Figure 4: Extracellular metabolite profiles of *S. eubayanus* strains CBS 12357<sup>T</sup> and IMS0750 in high-**

713 **gravity wort at 7-L pilot scale.** Fermentations were performed on wort with a gravity of 16.6 °Plato.

714 The average concentrations of glucose (■), maltose (▲), maltotriose (◆) and ethanol (●) are shown

715 for duplicate fermentations of CBS 12357<sup>T</sup> (blue) and IMS0750 (red). The average deviations are

716 indicated.

## 717 References

- 718 1. Libkind D, Hittinger CT, Valério E, Gonçalves C, Dover J, Johnston M, et al. Microbe  
719 domestication and the identification of the wild genetic stock of lager-brewing yeast. Proc Natl Acad  
720 Sci U S A. 2011;201105430.
- 721 2. Sampaio JP. Microbe Profile: *Saccharomyces eubayanus*, the missing link to lager beer yeasts.  
722 Microbiology. 2018;164(9):1069-71.
- 723 3. Peris D, Sylvester K, Libkind D, Gonçalves P, Sampaio JP, Alexander WG, et al. Population  
724 structure and reticulate evolution of *Saccharomyces eubayanus* and its lager-brewing hybrids. Mol  
725 Ecol. 2014;23(8):2031-45.
- 726 4. Bing J, Han P-J, Liu W-Q, Wang Q-M, Bai F-Y. Evidence for a Far East Asian origin of lager beer  
727 yeast. Curr Biol. 2014;24(10):R380-R1.
- 728 5. Gayevskiy V, Goddard MR. *Saccharomyces eubayanus* and *Saccharomyces arboricola* reside  
729 in North Island native New Zealand forests. Environ Microbiol. 2016;18(4):1137-47.
- 730 6. Dequin S. The potential of genetic engineering for improving brewing, wine-making and  
731 baking yeasts. Appl Environ Microbiol. 2001;56(5-6):577-88.

- 732 7. Zastrow C, Hollatz C, De Araujo P, Stambuk B. Maltotriose fermentation by *Saccharomyces*  
733 *cerevisiae*. J Ind Microbiol Biotechnol. 2001;27(1):34-8.
- 734 8. Hebly M, Brickwedde A, Bolat I, Driessen MR, de Hulster EA, van den Broek M, et al. *S.*  
735 *cerevisiae* × *S. eubayanus* interspecific hybrid, the best of both worlds and beyond. FEMS Yeast Res.  
736 2015;15(3).
- 737 9. Brickwedde A, Brouwers N, van den Broek M, Gallego Murillo JS, Fraiture JL, Pronk JT, et al.  
738 Structural, physiological and regulatory analysis of maltose transporter genes in *Saccharomyces*  
739 *eubayanus* CBS 12357T. Front Microbiol. 2018;9:1786.
- 740 10. Gallone B, Steensels J, Prah T, Soriaga L, Saels V, Herrera-Malaver B, et al. Domestication and  
741 Divergence of *Saccharomyces cerevisiae* Beer Yeasts. Cell. 2016;166(6):1397-410 e16.
- 742 11. Naumov GI, Naumova ES, Michels C. Genetic variation of the repeated *MAL* loci in natural  
743 populations of *Saccharomyces cerevisiae* and *Saccharomyces paradoxus*. Genetics. 1994;136(3):803-  
744 12.
- 745 12. Charron MJ, Read E, Haut SR, Michels CA. Molecular evolution of the telomere-associated  
746 *MAL* loci of *Saccharomyces*. Genetics. 1989;122(2):307-16.
- 747 13. Marques WL, Mans R, Marella ER, Cordeiro RL, van den Broek M, Daran J-MG, et al.  
748 Elimination of sucrose transport and hydrolysis in *Saccharomyces cerevisiae*: a platform strain for  
749 engineering sucrose metabolism. FEMS Yeast Res. 2017;17(1):fox006.
- 750 14. Chang Y, Dubin R, Perkins E, Michels C, Needleman R. Identification and characterization of  
751 the maltose permease in genetically defined *Saccharomyces* strain. J Bacteriol. 1989;171(11):6148-  
752 54.
- 753 15. Alves SL, Herberts RA, Hollatz C, Trichez D, Miletti LC, De Araujo PS, et al. Molecular analysis  
754 of maltotriose active transport and fermentation by *Saccharomyces cerevisiae* reveals a determinant  
755 role for the *AGT1* permease. Appl Environ Microbiol. 2008;74(5):1494-501.
- 756 16. Han EK, Cotty F, Sottas C, Jiang H, Michels CA. Characterization of *AGT1* encoding a general  $\alpha$ -  
757 glucoside transporter from *Saccharomyces*. Mol Microbiol. 1995;17(6):1093-107.
- 758 17. Stambuk BU, da Silva MA, Panek AD, de Araujo PS. Active  $\alpha$ -glucoside transport in  
759 *Saccharomyces cerevisiae*. FEMS Microbiol Lett. 1999;170(1):105-10.
- 760 18. Baker E, Wang B, Bellora N, Peris D, Hulfachor AB, Koshalek JA, et al. The genome sequence  
761 of *Saccharomyces eubayanus* and the domestication of lager-brewing yeasts. Mol Biol Evol.  
762 2015;32(11):2818-31.
- 763 19. Krogerus K, Magalhães F, Vidgren V, Gibson B. New lager yeast strains generated by  
764 interspecific hybridization. J Ind Microbiol Biotechnol. 2015;42(5):769-78.
- 765 20. Mertens S, Steensels J, Saels V, De Rouck G, Aerts G, Verstrepen KJ. A large set of newly  
766 created interspecific yeast hybrids increases aromatic diversity in lager beers. Appl Environ Microbiol.  
767 2015:AEM. 02464-15.
- 768 21. Vidgren V, Huuskonen A, Virtanen H, Ruohonen L, Londesborough J. Improved fermentation  
769 performance of a lager yeast after repair of its *AGT1* maltose and maltotriose transporter genes. Appl  
770 Environ Microbiol. 2009;75(8):2333-45.
- 771 22. Salema-Oom M, Pinto VV, Gonçalves P, Spencer-Martins I. Maltotriose utilization by  
772 industrial *Saccharomyces strains*: characterization of a new member of the  $\alpha$ -glucoside transporter  
773 family. Appl Environ Microbiol. 2005;71(9):5044-9.
- 774 23. Dietvorst J, Londesborough J, Steensma H. Maltotriose utilization in lager yeast strains: *MTT1*  
775 encodes a maltotriose transporter. Yeast. 2005;22(10):775-88.
- 776 24. Cousseau F, Alves Jr S, Trichez D, Stambuk B. Characterization of maltotriose transporters  
777 from the *Saccharomyces eubayanus* subgenome of the hybrid *Saccharomyces pastorianus* lager  
778 brewing yeast strain Weihenstephan 34/70. Lett Appl Microbiol. 2013;56(1):21-9.
- 779 25. Nguyen H-V, Legras J-L, Neuvéglise C, Gaillardin C. Deciphering the hybridisation history  
780 leading to the lager lineage based on the mosaic genomes of *Saccharomyces bayanus* strains  
781 NBRC1948 and CBS380T. PLoS One. 2011;6(10):e25821.
- 782 26. Nakao Y, Kanamori T, Itoh T, Kodama Y, Rainieri S, Nakamura N, et al. Genome sequence of  
783 the lager brewing yeast, an interspecies hybrid. DNA Res. 2009;16(2):115-29.

- 784 27. Vidgren V, Londesborough J. Characterization of the *Saccharomyces bayanus*-type *AGT1*  
785 transporter of lager yeast. *J Inst Brew.* 2012;118(2):148-51.
- 786 28. Kupiec M. Biology of telomeres: lessons from budding yeast. *FEMS Microbiol Rev.*  
787 2014;38(2):144-71.
- 788 29. Louis EJ, Haber JE. The structure and evolution of subtelomeric Y'repeats in *Saccharomyces*  
789 *cerevisiae*. *Genetics.* 1992;131(3):559-74.
- 790 30. Louis EJ. The chromosome ends of *Saccharomyces cerevisiae*. *Yeast.* 1995;11(16):1553-73.
- 791 31. Peter J, De Chiara M, Friedrich A, Yue JX, Pflieger D, Bergstrom A, et al. Genome evolution  
792 across 1,011 *Saccharomyces cerevisiae* isolates. *Nature.* 2018;556(7701):339-44.
- 793 32. Dunn B, Richter C, Kvitek DJ, Pugh T, Sherlock G. Analysis of the *Saccharomyces cerevisiae*  
794 pan-genome reveals a pool of copy number variants distributed in diverse yeast strains from differing  
795 industrial environments. *Genome Res.* 2012;gr. 130310.111.
- 796 33. Song W, Dominska M, Greenwell PW, Petes TD. Genome-wide high-resolution mapping of  
797 chromosome fragile sites in *Saccharomyces cerevisiae*. *Proc Natl Acad Sci U S A.* 2014;201406847.
- 798 34. Pryde FE, Huckle TC, Louis EJ. Sequence analysis of the right end of chromosome XV in  
799 *Saccharomyces cerevisiae*: an insight into the structural and functional significance of sub-telomeric  
800 repeat sequences. *Yeast.* 1995;11(4):371-82.
- 801 35. Brown CA, Murray AW, Verstrepen KJ. Rapid expansion and functional divergence of  
802 subtelomeric gene families in yeasts. *Curr Biol.* 2010;20(10):895-903.
- 803 36. Bergström A, Simpson JT, Salinas F, Barré B, Parts L, Zia A, et al. A high-definition view of  
804 functional genetic variation from natural yeast genomes. *Mol Biol Evol.* 2014;31(4):872-88.
- 805 37. Anderson MZ, Wigen LJ, Burrack LS, Berman J. Real-time evolution of a subtelomeric gene  
806 family in *Candida albicans*. *Genetics.* 2015;genetics. 115.177451.
- 807 38. Taylor JS, Raes J. Duplication and divergence: the evolution of new genes and old ideas. *Annu*  
808 *Rev Genet.* 2004;38:615-43.
- 809 39. Voordeckers K, Verstrepen KJ. Experimental evolution of the model eukaryote  
810 *Saccharomyces cerevisiae* yields insight into the molecular mechanisms underlying adaptation. *Curr*  
811 *Opin Biotechnol.* 2015;28:1-9.
- 812 40. Force A, Lynch M, Pickett FB, Amores A, Yan Y-I, Postlethwait J. Preservation of duplicate  
813 genes by complementary, degenerative mutations. *Genetics.* 1999;151(4):1531-45.
- 814 41. Lynch M, Force A. The probability of duplicate gene preservation by subfunctionalization.  
815 *Genetics.* 2000;154(1):459-73.
- 816 42. Tang Y-C, Amon A. Gene copy-number alterations: a cost-benefit analysis. *Cell.*  
817 2013;152(3):394-405.
- 818 43. Voordeckers K, Brown CA, Vanneste K, van der Zande E, Voet A, Maere S, et al.  
819 Reconstruction of ancestral metabolic enzymes reveals molecular mechanisms underlying  
820 evolutionary innovation through gene duplication. *PLoS biology.* 2012;10(12):e1001446.
- 821 44. Christiaens JF, Van Mulders SE, Duitama J, Brown CA, Ghequire MG, De Meester L, et al.  
822 Functional divergence of gene duplicates through ectopic recombination. *EMBO Rep.*  
823 2012;13(12):1145-51.
- 824 45. He X, Zhang J. Rapid subfunctionalization accompanied by prolonged and substantial  
825 neofunctionalization in duplicate gene evolution. *Genetics.* 2005;169(2):1157-64.
- 826 46. Rastogi S, Liberles DA. Subfunctionalization of duplicated genes as a transition state to  
827 neofunctionalization. *BMC Evol Biol.* 2005;5(1):28.
- 828 47. Deng C, Cheng C-HC, Ye H, He X, Chen L. Evolution of an antifreeze protein by  
829 neofunctionalization under escape from adaptive conflict. *Proc Natl Acad Sci U S A.* 2010;201007883.
- 830 48. Des Marais DL, Rausher MD. Escape from adaptive conflict after duplication in an  
831 anthocyanin pathway gene. *Nature.* 2008;454(7205):762.
- 832 49. Hittinger CT, Carroll SB. Gene duplication and the adaptive evolution of a classic genetic  
833 switch. *Nature.* 2007;449(7163):677.
- 834

- 835 50. Mans R, Daran J-MG, Pronk JT. Under pressure: Evolutionary engineering of yeast strains for  
836 improved performance in fuels and chemicals production. *Curr Opin Biotechnol.* 2018;50:47-56.
- 837 51. Bachmann H, Pronk JT, Kleerebezem M, Teusink B. Evolutionary engineering to enhance  
838 starter culture performance in food fermentations. *Curr Opin Biotechnol.* 2015;32:1-7.
- 839 52. Darwin C. *On the origin of species*, 1859: Routledge; 2004.
- 840 53. Yona AH, Manor YS, Herbst RH, Romano GH, Mitchell A, Kupiec M, et al. Chromosomal  
841 duplication is a transient evolutionary solution to stress. *Proc Natl Acad Sci U S A.*  
842 2012;109(51):21010-5.
- 843 54. Gresham D, Desai MM, Tucker CM, Jenq HT, Pai DA, Ward A, et al. The repertoire and  
844 dynamics of evolutionary adaptations to controlled nutrient-limited environments in yeast. *PLoS*  
845 *Genet.* 2008;4(12):e1000303.
- 846 55. González-Ramos D, Gorter de Vries AR, Grijsseels SS, Berkum MC, Swinnen S, Broek M, et al. A  
847 new laboratory evolution approach to select for constitutive acetic acid tolerance in *Saccharomyces*  
848 *cerevisiae* and identification of causal mutations. *Biotechnol Biofuels.* 2016;9(1):173.
- 849 56. Caspeta L, Chen Y, Ghiaci P, Feizi A, Buskov S, Hallström BM, et al. Altered sterol composition  
850 renders yeast thermotolerant. *Science.* 2014;346(6205):75-8.
- 851 57. Papapetridis I, Verhoeven MD, Wiersma SJ, Goudriaan M, van Maris AJA, Pronk JT.  
852 Laboratory evolution for forced glucose-xylose co-consumption enables identification of mutations  
853 that improve mixed-sugar fermentation by xylose-fermenting *Saccharomyces cerevisiae*. *FEMS Yeast*  
854 *Res.* 2018;18(6):foy056.
- 855 58. Verhoeven MD, Bracher JM, Nijland JG, Bouwknecht J, Daran J-MG, Driessen AJM, et al.  
856 Laboratory evolution of a glucose-phosphorylation-deficient, arabinose-fermenting *S. cerevisiae*  
857 strain reveals mutations in *GAL2* that enable glucose-insensitive l-arabinose uptake. *FEMS Yeast Res.*  
858 2018.
- 859 59. Hong K-K, Vongsangnak W, Vemuri GN, Nielsen J. Unravelling evolutionary strategies of yeast  
860 for improving galactose utilization through integrated systems level analysis. *Proc Natl Acad Sci U S A.*  
861 2011;108(29):12179-84.
- 862 60. Brickwedde A, van den Broek M, Geertman J-MA, Magalhães F, Kuijpers NG, Gibson B, et al.  
863 Evolutionary engineering in chemostat cultures for improved maltotriose fermentation kinetics in  
864 *Saccharomyces pastorianus* lager brewing yeast. *Front Microbiol.* 2017;8:1690.
- 865 61. Verduyn C, Postma E, Scheffers WA, Van Dijken JP. Effect of benzoic acid on metabolic fluxes  
866 in yeasts: a continuous-culture study on the regulation of respiration and alcoholic fermentation.  
867 *Yeast.* 1992;8(7):501-17.
- 868 62. Lam V, Daruwalla K, Henderson P, Jones-Mortimer M. Proton-linked D-xylose transport in  
869 *Escherichia coli*. *J Bacteriol.* 1980;143(1):396-402.
- 870 63. Henderson R, Poolman B. Proton-solute coupling mechanism of the maltose transporter from  
871 *Saccharomyces cerevisiae*. *Sci Rep.* 2017;7(1):14375.
- 872 64. Cherry JM, Hong EL, Amundsen C, Balakrishnan R, Binkley G, Chan ET, et al. *Saccharomyces*  
873 *Genome Database: the genomics resource of budding yeast.* *Nucleic Acids Res.* 2011;40(D1):D700-  
874 D5.
- 875 65. Gibbs MD, Nevalainen KH, Bergquist PL. Degenerate oligonucleotide gene shuffling (DOGS): a  
876 method for enhancing the frequency of recombination with family shuffling. *Gene.* 2001;271(1):13-  
877 20.
- 878 66. Stemmer WP. Rapid evolution of a protein in vitro by DNA shuffling. *Nature.*  
879 1994;370(6488):389.
- 880 67. Cherry JR, Fidantsef AL. Directed evolution of industrial enzymes: an update. *Curr Opin*  
881 *Biotechnol.* 2003;14(4):438-43.
- 882 68. Rogers RL, Bedford T, Lyons AM, Hartl DL. Adaptive impact of the chimeric gene Quetzalcoat1  
883 in *Drosophila melanogaster*. *Proc Natl Acad Sci U S A.* 2010;107(24):10943-8.
- 884 69. Dunn B, Paulish T, Stanbery A, Piotrowski J, Koniges G, Kroll E, et al. Recurrent rearrangement  
885 during adaptive evolution in an interspecific yeast hybrid suggests a model for rapid introgression.  
886 *PLoS Genet.* 2013;9(3):e1003366.

- 887 70. Hernandez-Rivas R, Hinterberg K, Scherf A. Compartmentalization of genes coding for  
888 immunodominant antigens to fragile chromosome ends leads to dispersed subtelomeric gene  
889 families and rapid gene evolution in *Plasmodium falciparum*. *Mol Biochem Parasitol*. 1996;78(1-  
890 2):137-48.
- 891 71. Varzakas TH, Arvanitoyannis IS, Baltas H. The politics and science behind GMO acceptance.  
892 *Crit Rev Food Sci Nutr*. 2007;47(4):335-61.
- 893 72. Zheng X, D'Amore T, Russell I, Stewart G. Factors influencing maltotriose utilization during  
894 brewery wort fermentations. *Journal of the American Society of Brewing Chemists*. 1994;52(2):41-7.
- 895 73. Verstrepren KJ, Derdelinckx G, Dufour J-P, Winderickx J, Thevelein JM, Pretorius IS, et al.  
896 Flavor-active esters: adding fruitiness to beer. *J Biosci Bioeng*. 2003;96(2):110-8.
- 897 74. García AI, García LA, Díaz M. Modelling of diacetyl production during beer fermentation. *J*  
898 *Inst Brew*. 1994;100(3):179-83.
- 899 75. Krogerus K, Magalhães F, Vidgren V, Gibson B. Novel brewing yeast hybrids: creation and  
900 application. *Appl Microbiol Biotechnol*. 2017;101(1):65-78.
- 901 76. Bellon JR, Eglinton JM, Siebert TE, Pollnitz AP, Rose L, de Barros Lopes M, et al. Newly  
902 generated interspecific wine yeast hybrids introduce flavour and aroma diversity to wines. *Appl*  
903 *Microbiol Biotechnol*. 2011;91(3):603-12.
- 904 77. Peris D, Moriarty RV, Alexander WG, Baker E, Sylvester K, Sardi M, et al. Hybridization and  
905 adaptive evolution of diverse *Saccharomyces* species for cellulosic biofuel production. *Biotechnol*  
906 *Biofuels*  
907 2017;10(1):78.
- 908 78. Van den Broek M, Bolat I, Nijkamp JF, Ramos E, Luttk MAH, Koopman F, et al. Chromosomal  
909 copy number variation in *Saccharomyces pastorianus* evidence for extensive genome dynamics in  
910 industrial lager brewing strains. *Appl Environ Microbiol*. 2015:AEM. 01263-15.
- 911 79. Solis-Escalante D, Kuijpers NG, Nadine B, Bolat I, Bosman L, Pronk JT, et al. amdSYM, a new  
912 dominant recyclable marker cassette for *Saccharomyces cerevisiae*. *FEMS Yeast Res*. 2013;13(1):126-  
913 39.
- 914 80. Salazar AN, Gorter de Vries AR, van den Broek M, Wijsman M, de la Torre Cortés P,  
915 Brickwedde A, et al. Nanopore sequencing enables near-complete de novo assembly of  
916 *Saccharomyces cerevisiae* reference strain CEN. PK113-7D. *FEMS Yeast Res*. 2017;17(7).
- 917 81. Li H, Durbin R. Fast and accurate long-read alignment with Burrows–Wheeler transform.  
918 *Bioinformatics*. 2010;26(5):589-95.
- 919 82. Li H, Handsaker B, Wysoker A, Fennell T, Ruan J, Homer N, et al. The sequence  
920 alignment/map format and SAMtools. *Bioinformatics*. 2009;25(16):2078-9.
- 921 83. Walker BJ, Abeel T, Shea T, Priest M, Abouelliel A, Sakthikumar S, et al. Pilon: an integrated  
922 tool for comprehensive microbial variant detection and genome assembly improvement. *PloS one*.  
923 2014;9(11):e112963.
- 924 84. Chen K, Wallis JW, McLellan MD, Larson DE, Kalicki JM, Pohl CS, et al. BreakDancer: an  
925 algorithm for high-resolution mapping of genomic structural variation. *Nat Methods*. 2009;6(9):677.
- 926 85. Nijkamp JF, van den Broek MA, Geertman J-MA, Reinders MJ, Daran J-MG, de Ridder D. De  
927 novo detection of copy number variation by co-assembly. *Bioinformatics*. 2012;28(24):3195-202.
- 928 86. Simpson JT, Wong K, Jackman SD, Schein JE, Jones SJ, Birol I. ABySS: a parallel assembler for  
929 short read sequence data. *Genome Res*. 2009;gr. 089532.108.
- 930 87. Robinson JT, Thorvaldsdóttir H, Winckler W, Guttman M, Lander ES, Getz G, et al. Integrative  
931 genomics viewer. *Nat Biotechnol*. 2011;29(1):24.
- 932 88. Koren S, Walenz BP, Berlin K, Miller JR, Bergman NH, Phillippy AM. Canu: scalable and  
933 accurate long-read assembly via adaptive k-mer weighting and repeat separation. *Genome Res*.  
934 2017;gr. 215087.116.
- 935 89. Li H. Minimap2: pairwise alignment for nucleotide sequences. *Bioinformatics*. 2018;1:7.
- 936 90. Pengelly RJ, Wheals AE. Rapid identification of *Saccharomyces eubayanus* and its hybrids.  
937 *FEMS Yeast Res*. 2013;13(2):156-61.

- 938 91. Muir A, Harrison E, Wheals A. A multiplex set of species-specific primers for rapid  
939 identification of members of the genus *Saccharomyces*. *FEMS Yeast Res.* 2011;11(7):552-63.
- 940 92. Schoch CL, Seifert KA, Huhndorf S, Robert V, Spouge JL, Levesque CA, et al. Nuclear ribosomal  
941 internal transcribed spacer (ITS) region as a universal DNA barcode marker for Fungi. *Proc Natl Acad*  
942 *Sci U S A.* 2012;109(16):6241-6.
- 943 93. Gibson DG, Young L, Chuang R-Y, Venter JC, Hutchison III CA, Smith HO. Enzymatic assembly  
944 of DNA molecules up to several hundred kilobases. *Nat Methods.* 2009;6(5):343.
- 945 94. de Kok S, Yilmaz D, Suir E, Pronk JT, Daran J-MG, van Maris AJA. Increasing free-energy (ATP)  
946 conservation in maltose-grown *Saccharomyces cerevisiae* by expression of a heterologous maltose  
947 phosphorylase. *Metab Eng.* 2011;13(5):518-26.
- 948 95. Bao Z, Xiao H, Liang J, Zhang L, Xiong X, Sun N, et al. Homology-integrated CRISPR–Cas (HI-  
949 CRISPR) system for one-step multigene disruption in *Saccharomyces cerevisiae*. *ACS Synth Biol.*  
950 2014;4(5):585-94.
- 951 96. Gorter de Vries AR, Groot PA, Broek M, Daran J-MG. CRISPR-Cas9 mediated gene deletions in  
952 lager yeast *Saccharomyces pastorianus*. *Microb Cell Fact.* 2017;16(1):222.
- 953 97. Biasini M, Bienert S, Waterhouse A, Arnold K, Studer G, Schmidt T, et al. SWISS-MODEL:  
954 modelling protein tertiary and quaternary structure using evolutionary information. *Nucleic Acids*  
955 *Res.* 2014;42(W1):W252-W8.
- 956 98. Guex N, Peitsch MC, Schwede T. Automated comparative protein structure modeling with  
957 SWISS-MODEL and Swiss-PdbViewer: A historical perspective. *Electrophoresis.* 2009;30(S1):S162-S73.
- 958



959 **Supporting information captions**

960 **Table S1: Primers used in this study**

| Primer # | Sequence 5' to 3'                                                                                | Purpose                                                                |
|----------|--------------------------------------------------------------------------------------------------|------------------------------------------------------------------------|
| 4224     | TTGATGTAATATCTAGGAAATACACTTG                                                                     | ScSGA1 diagnostic out-out primer                                       |
| 4226     | ACTCGTACAAGGTGCTTTTAACTTG                                                                        | ScSGA1 diagnostic out-out primer                                       |
| 5921     | AAAACCTAGATTAGATTGCTATGCTTTCTTCTAATGAGC                                                          | p426 backbone amplification                                            |
| 7812     | TCATGTAATTAGTTATGTCACGCTTACATTC                                                                  | p426 backbone amplification                                            |
| 8570     | GCGCTTTACATTCAGATCCCGAG                                                                          | Diagnostic identification <i>S. cerevisiae</i>                         |
| 8571     | TAAGTTGGTTGTCAGCAAGATTG                                                                          | Diagnostic identification <i>S. cerevisiae</i>                         |
| 8572     | GTCCTGTAC CAATTTAATATTGCGC                                                                       | Diagnostic identification <i>S. eubayanus</i>                          |
| 8573     | TTTCACATCT CTTAGTCTTTCCAGACG                                                                     | Diagnostic identification <i>S. eubayanus</i>                          |
| 9036     | TTTACAATATAGTGATAATCGTGGACTAGAGCAAGATTTCAAATAAGTAACAGCAGCA<br>AACATAGCTTCAAATGTTTCTACTCCTTTTTTAC | Fragment amplification for ScSGA1 integration with maltase             |
| 9039     | CACCTTTCGAGAGGACGATGCCCGTGTCTAAATGATTGACCCAGCCTAAGAATGTTCA<br>ACGCCGCAAATTAAGCCTTCG              | Fragment amplification for ScSGA1 integration with maltase             |
| 9355     | TGTAATATCTAGGAAATACACTTGTGTATACTTCTCGCTTTTCTTTATTTTTTTTTGTA<br>GTTTATCATTATCAATACTCGCCATTTT      | Maltase fragment amplification for ScSGA1 integration with transporter |
| 9596     | GTTGAACATTCTTAGGCTGGTCAATCATTAGACACGGGCATCGTCTCTCGAAAGG<br>TGGTGTGGAAGAACGATTACAACAG             | Maltase fragment amplification for ScSGA1 integration with transporter |
| 10199    | TCCGTAGGTGAACCTGCGG                                                                              | ITS1 forward                                                           |
| 10202    | TCCTCCGCTTATTGATATGC                                                                             | ITS4 reverse                                                           |
| 10491    | GCTCATTAGAAAGAAAGCATAGCAATCTAATCTAAGTTTTAAAGTTTCGGTATACTTAG<br>CAGACAG                           | MalT1 amplification with p426 backbone overhang                        |
| 10492    | GGAGGGCGTGAATGTAAGCGTGACATAACTAATTACATGATACCCTAATCAAGTAAAT<br>AGATAATAAAGTTAATGTG                | MalT1 amplification with p426 backbone overhang                        |
| 10632    | GGAGGGCGTGAATGTAAGCGTGACATAACTAATTACATGATGCGCTAAGAGTCATCA<br>AT                                  | MalT2/4 amplification with p426 backbone overhang                      |
| 10633    | GCTCATTAGAAAGAAAGCATAGCAATCTAATCTAAGTTTTGAGGCGTGATATGCTCCA<br>T                                  | MalT2/4 amplification with p426 backbone overhang                      |
| 10671    | GGAGGGCGTGAATGTAAGCGTGACATAACTAATTACATGATGTCAGATAACAAAACC<br>AGATAACC                            | MalT3 amplification with p426 backbone overhang                        |
| 10672    | GCTCATTAGAAAGAAAGCATAGCAATCTAATCTAAGTTTTGATAGAAATATCCTGCTG<br>AACC                               | MalT3 amplification with p426 backbone overhang                        |
| 11909    | ACTTGTGGCTTCTCAAAGATGTC                                                                          | Diagnostic identification <i>S. eubayanus</i>                          |
| 12635    | CACGAACCATGTCCTGTAG                                                                              | SeSGA1 diagnostic out-out primer                                       |
| 12636    | GTTGGACGTTCCGGCATAGC                                                                             | SeSGA1 diagnostic out-out primer                                       |
| 13559    | GCCCTGAAAGCCGTTATCCATTTCTGTTGTTACACAAGAAGATTTGACGCGCAGGACC<br>CACATAGCTTCAAATGTTTCTACTCCTTTTTTAC | Fragment amplification for SeSGA1 integration                          |
| 13560    | TTCTTGTCTTATTTGATGGGCGTCCCAAATGAGGTGTAGGACCAAGTGAGGTGCCGA<br>GCGCAAATTAAGCCTTCGAGCG              | Fragment amplification for SeSGA1 integration                          |

961

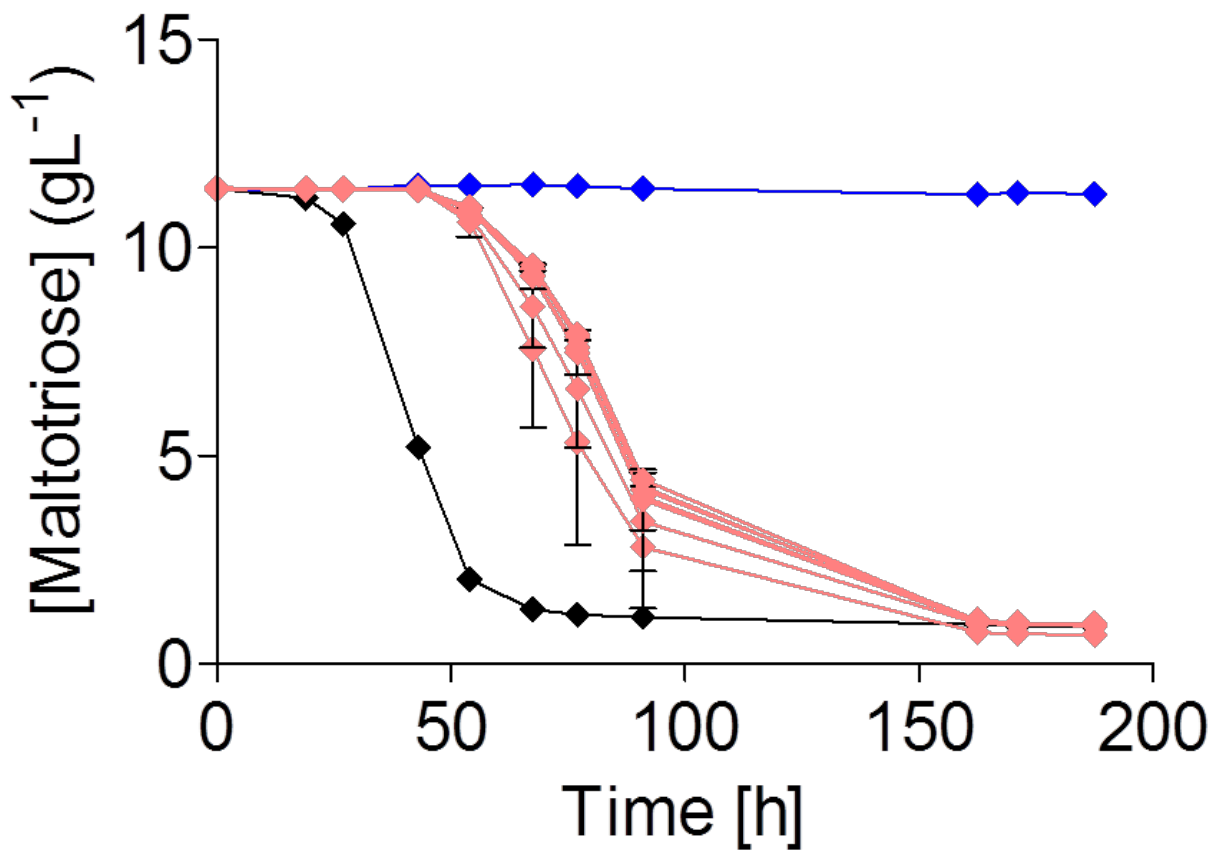

962

963 **Figure S1: Characterization of enriched mutants IMS0637-IMS0643 on SMMt.** Characterization of *S.*  
964 *pastorianus* CBS 1483 (black), *S. eubayanus* CBS 12357<sup>T</sup> (blue) and selected mutants IMS0637-  
965 IMS0643 (light red) on SMMt at 20 °C. The average concentration of maltotriose (◆) and average  
966 deviation were determined from two replicates. IMS0637 was chosen as representative for all  
967 mutants.

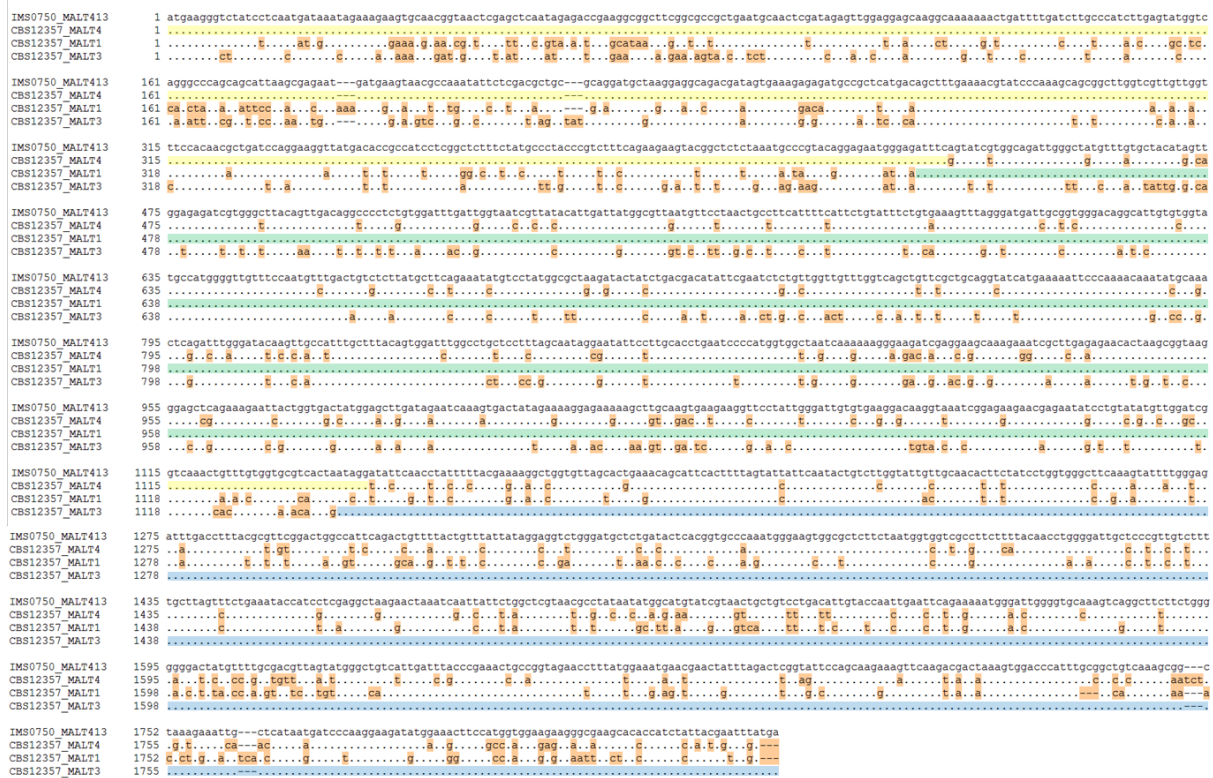

968

969 **Figure S2: Sequence alignment of the *SeMALT* transporter genes from CBS 12357<sup>T</sup> to the new**  
 970 **recombined *SeMALT413* transporter gene from IMS0750.** The alignment was performed using the  
 971 Clone manager software (version 9.51, Sci-Ed Software). Identical nucleotides are shown by dots and  
 972 nucleotides which differ from *SpMTY1* are shown in orange. In addition, the sequences which match  
 973 exactly are highlighter in yellow for *SeMALT4*, in green for *SeMALT1* and in blue for *SeMALT3*.

```

SeMALT413p 1 MKGLSSMINRKKCNNGNSSSIETEGGFCAAECNSIELEEQGGKKTDFDLAHLEYGQG
Xyle -----
PAALSENDEVTPNILDAAQDAKEADDSEREMPLMTALKTYPKAAAWSLLVSTTLI
-----ITLVATLGGL
QEGYDTAILGSFYALPVFQKKYGS LNARTGEWEISVSWQIGLCLCYIVGEIVGLQ
LFGYDTAVISG--TVESLNTV FVAPQN--LSESAANSLLGFCVASALIGCIIGGA
LTGPSVDLIGNRYTLIMALMFLTAFIFILYFCES-----LGM
LGGYCSNRFGRRDSLKIAAVLFFISGVGSAWPELGFTSINPDNTVPVYLAGYVPE
IAVGQALCGMPWGC FQCLTVSYASEICPMALRYYLTTYSNLCWLFQQLFAAGIMK
FVIYRIIGGIGVGLASMLSPMYIAELAPAHIRGKLVSNQFAIFGQLLVYCVNY
NSQNKYA---NSDLGYKLPFALQWIWPAPLAIGIFLAPESPWWLIKKGKIEEAKK
FIARSGDASWLN TDGWRYMFASECIPALLFLMLLYTVPE SPRWLM SRGKQEQAEG
SLERTLSGKGAQKELLVTMELDRIKVTIEKEKKLASEEGSYWDCVKDKVNRRTTR
ILRKIMGNT-----LATQAVQEI KHS LDH-----GRKTGGRLM---FGVGVIV
ISCICWIGQTVCGA-SLIGYSTYFYEKAGVSTETAFTFSIIQYCLGIVATLLSWW
IGVMLSIFQQFVGINVVLYYAPEVFKTLGASTDIALLOTIIVGVINLTFTVLAIM
ASKYFGRFDLYAFGLAIQTVLLFIIGGLGCS DTHGAQMGS GALLMVVAFFYNLGI
TVDKFGRKPLQIIGALGMAIGMFS LGTAFY-TQ-APGIVALLSMLFYVA AFAMSW
APVVFCLVSEIPSSRLRTKSIILARNAYNMACIVTAVLTLYQLNS----EKWDWG
GPVCWVLLSEIFPNAIRGKALAI AVAAQWLANYFVSWTFPMMDKNSWLVAHFHN-
AKSGFFWGGGLCFATLVWAVIDLPE TAGRTFMEMNELFRLGIPARKFKTKVDPFA
GFSYWIYGCMGVLAALFMWKFPETKGK TLEELEALWE-----
AVKAAKEIAHNDPKEDMETS MVEEGRSTPSITNL 616
-----

```

974

975 **Figure S3: Alignment of SeMalt413 to Xyle using by Promod3 for protein structure prediction.**

976

Transmembrane domain  $\alpha$ -helices are indicated in red.

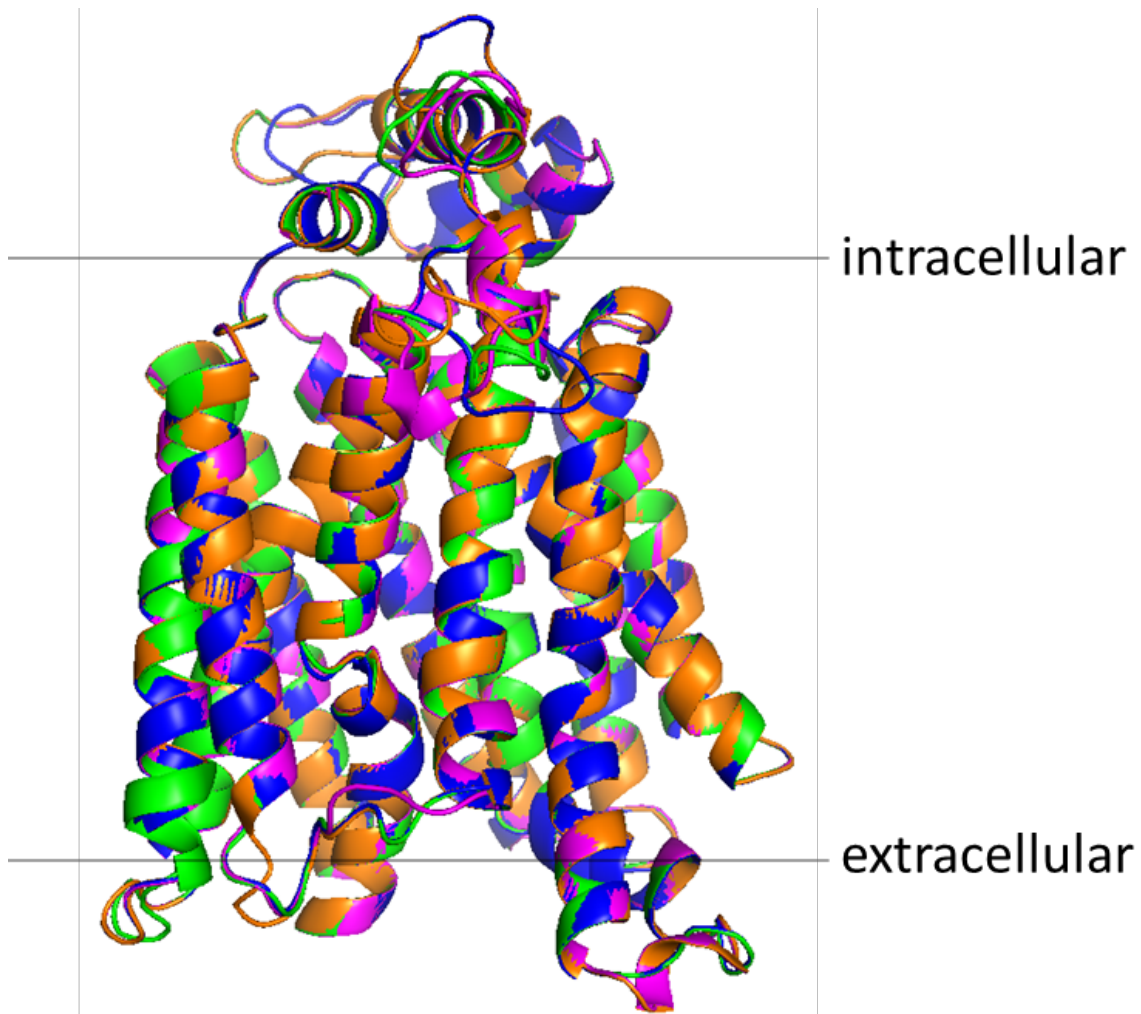

977

978 **Figure S4: Protein structure overlay of SeMalt1 (green), SeMalt4 (orange), SeMalt3 (blue) and**  
979 **SeMalt413 (magenta).** *SeMALT* genes were translated into amino acid sequence and used for  
980 structural prediction using SWISS-MODEL with XyleE as a structural template. Resulting SeMalt protein  
981 structures were overlaid using PyMOL.

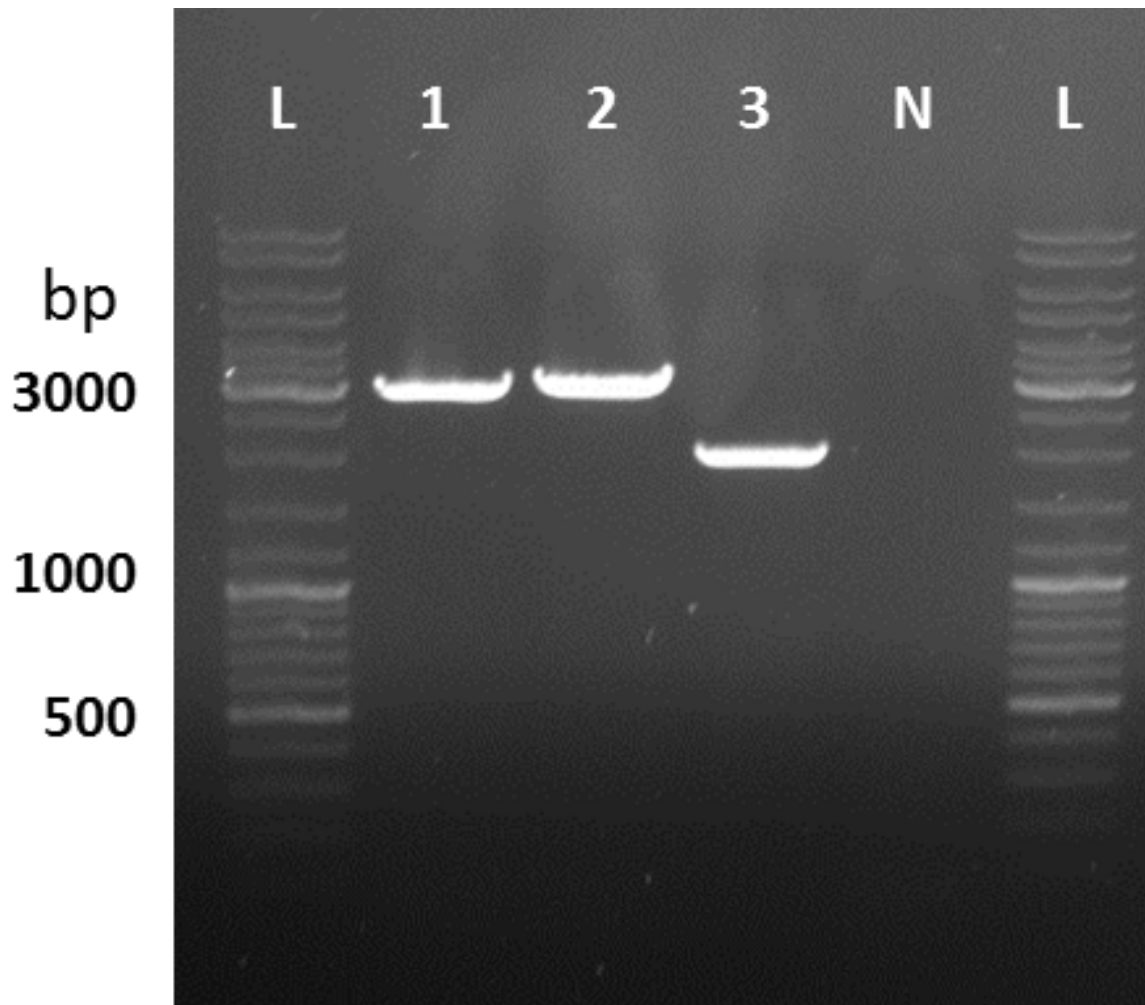

982

983 **Figure S5: Amplification of the *SeSGA1* locus to verify integration of *SeMALT2* in IMX1941 and of**  
984 ***SeMALT413* in IMX1942.** The *SeSGA1* locus was amplified from genomic DNA of IMX1941 (1),  
985 IMX1942 (2) and CBS 12357<sup>T</sup> (3) using primers 12635/12636 and Phusion polymerase (Thermo  
986 Fischer Scientific). At the *SeSGA1* locus, IMX1941 should harbor *ScTEF1p-SeMALT2-ScCYC1t* and  
987 IMX1942 should harbor *ScTEF1p-SeMALT413-ScCYC1t*. As a negative control, a PCR was done with  
988 primers 12635/12636 without template DNA. L indicates the GeneRuler DNA Ladder Mix (Thermo  
989 Fischer Scientific).

990

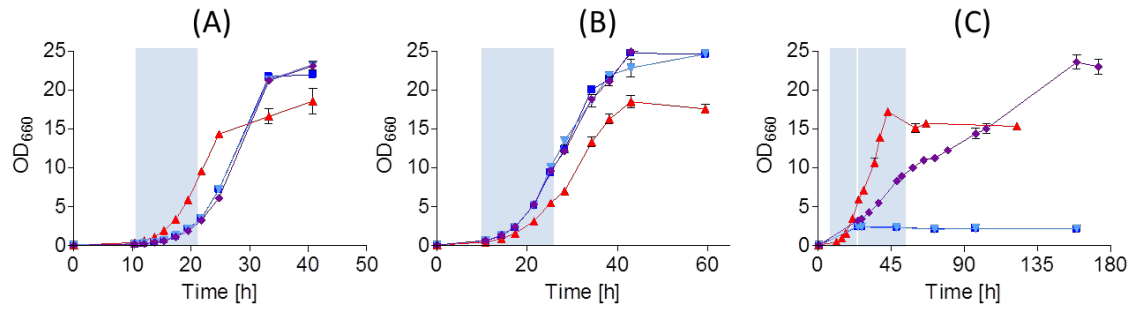

991

992 **Figure S6: Characterization of (■) CBS 12357<sup>T</sup>, (▲) IMS0750, (▼) IMX1941, (◆) IMX1942 on SM (A)**  
993 **glucose, (B) maltose and (C) maltotriose.** Strains were cultivated at 20 °C and optical densities were  
994 measured at 660 nm. Data represent average and standard deviation of three biological replicates.  
995 Blue boxes represent the timeframe used to calculate growth rates.

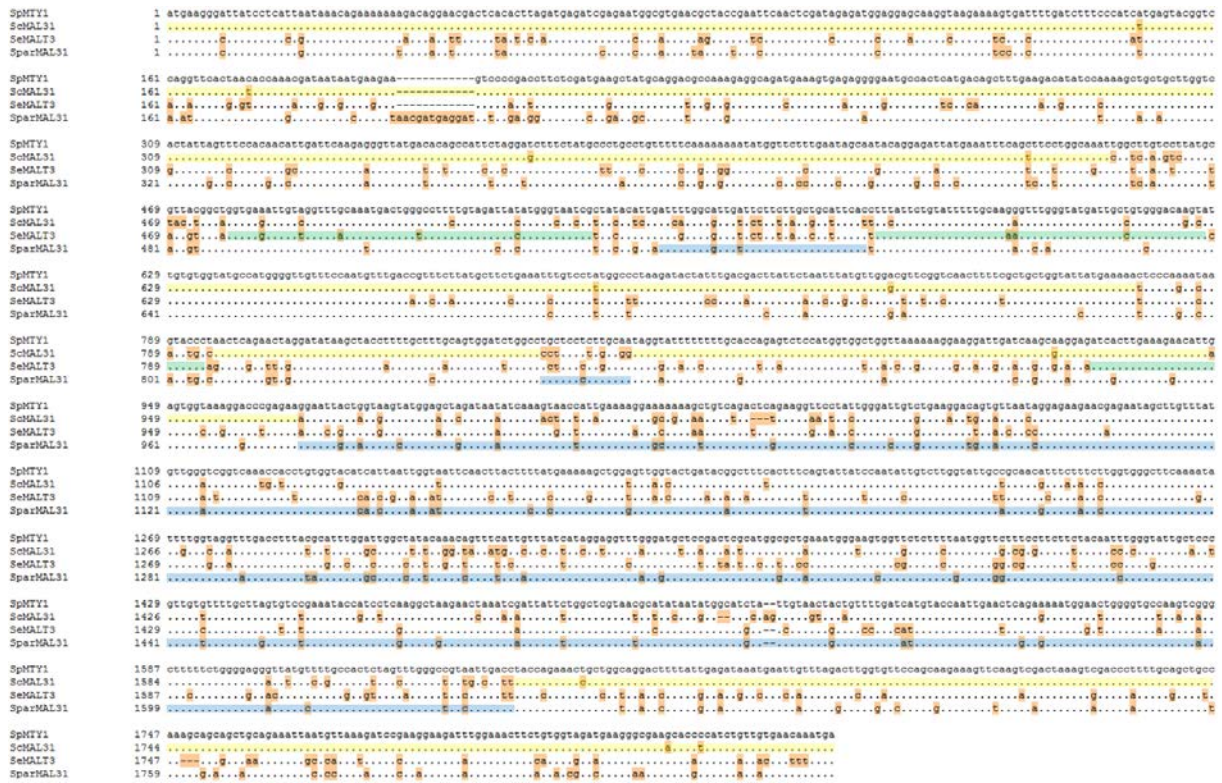

996

997 **Figure S7: Alignment of *ScMAL31*, *SeMAL31* and *SparMAL31* to *SpMTY1* as obtained using Clone**

998 **Manager.** Identical nucleotides are shown by dots and nucleotides which differ from *SpMTY1* are

999 shown in orange. In addition, the high-similarity sequences described in the main text are highlighted

1000 in yellow for *ScMAL31*, in green for *SeMAL31* and in blue for *SparMAL31*.



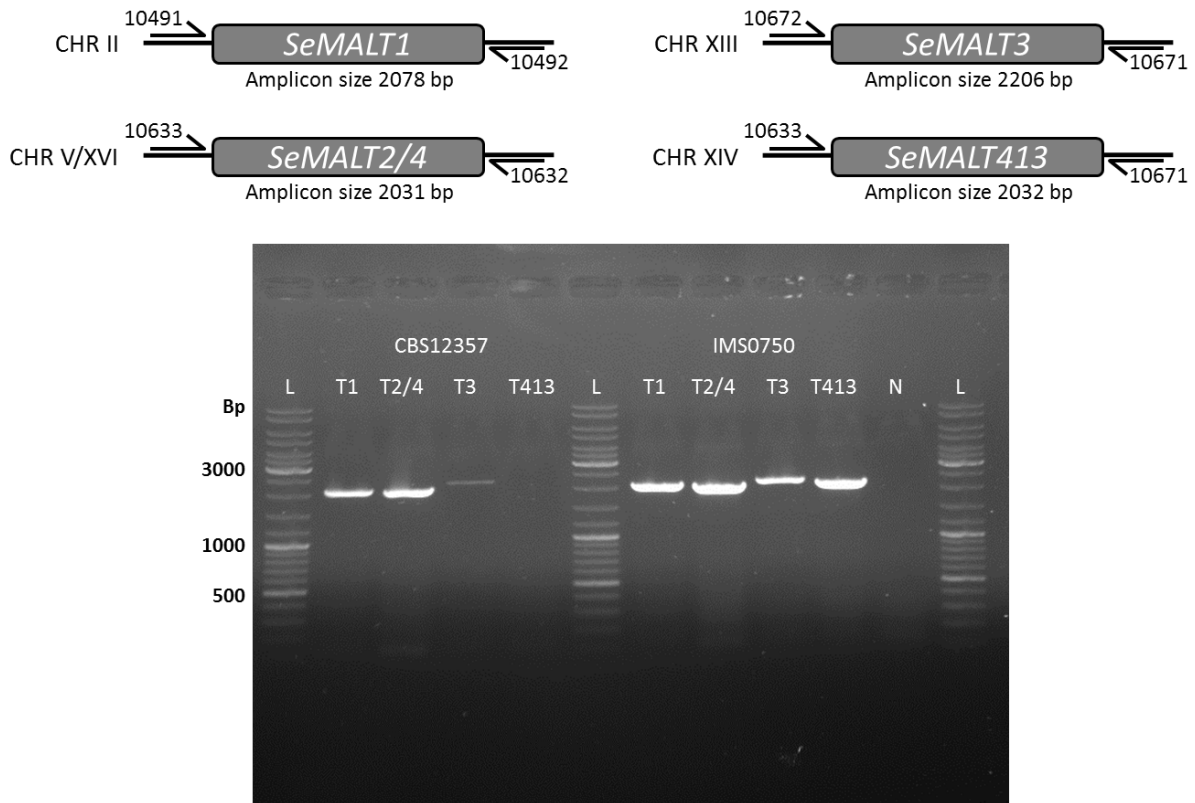

1001

1002 **Figure S8: PCR amplification of *SeMALT* genes in wild type CBS 12357<sup>T</sup> and evolved mutant**  
1003 **IMS0750.** The *SeMALT* genes were amplified from genomic DNA of CBS 12357<sup>T</sup> and IMS0750 using  
1004 Phusion polymerase (Thermo Fischer Scientific). Lanes show PCR products for *SeMALT1* (primers  
1005 10491/10492), *SeMALT2* and *SeMALT4* (primers 10633/10632), *SeMALT3* (primers 10672/10671) and  
1006 *SeMALT413* (primers 10633/10671). As a negative control, a PCR was done with primers  
1007 10633/10632 without template DNA. L indicates the GeneRuler DNA Ladder Mix (Thermo Fischer  
1008 Scientific).
